# Supplementary material
Source: PubMed Central journal article supplement (PMC4163021)
Supplement: NIHMS567874-supplement-01.pdf [file NIHMS567874-supplement-01.pdf]

## **Supplementary Information**

### ***In silico* derived small molecules bind the filovirus VP35 protein and inhibit its polymerase co-factor activity**

Craig S. Brown<sup>a,b,j,1</sup>, Michael S. Lee<sup>c,d,1</sup>, Daisy W. Leung<sup>a,1</sup>, Tianjiao Wang<sup>b</sup>, Wei Xu<sup>a</sup>, Priya Luthra<sup>e</sup>, Manu Anantpadma<sup>f</sup>, Reed S. Shabman<sup>e</sup>, Lisa M. Melito<sup>g</sup>, Karen S. MacMillan<sup>g</sup>, Dominika M. Borek<sup>g,h,i</sup>, Zbyszek Otwinowski<sup>g,h,i</sup>, Parameshwaran Ramanan<sup>a,k</sup>, Alisha J. Stubbs<sup>b,j</sup>, Dayna S. Peterson<sup>b,j</sup>, Jennifer M. Binning<sup>a,k</sup>, Marco Tonelli<sup>l</sup>, Mark A. Olson<sup>d</sup>, Rob Davey<sup>f</sup>, Joseph M. Ready<sup>g</sup>, Christopher F. Basler<sup>e</sup>, and Gaya K. Amarasinghe<sup>a\*</sup>

<sup>a</sup>Department of Pathology and Immunology, Washington University School of Medicine, St Louis, MO 63110; <sup>b</sup> Roy J. Carver Department of Biochemistry, Biophysics and Molecular Biology, Iowa State University, Ames, IA 50011; <sup>c</sup>Computational Sciences and Engineering Branch, US Army Research Laboratory, Aberdeen, MD 21005; <sup>d</sup>Integrated Toxicology Division, USAMRIID, 1425 Porter St., Ft. Detrick, MD 21702; <sup>e</sup>Department of Microbiology, Icahn School of Medicine at Mount Sinai, New York, NY 10029; <sup>f</sup> Department of Virology and Immunology, Texas Biomedical Research Institute, San Antonio, Texas, 78227; <sup>g</sup>Department of Biochemistry & <sup>h</sup>Department of Biophysics, UT Southwestern Medical Center at Dallas, Dallas, TX 75390; <sup>i</sup>Center for Structural Genomics of Infectious Diseases (CSGID), Chicago, Illinois; <sup>j</sup>Biochemistry Undergraduate Program, Iowa State University, Ames, IA 50011; <sup>k</sup>Biochemistry Graduate Program, Iowa State University, Ames, IA 50011; <sup>l</sup>National Magnetic Resonance Facility at Madison, University of Wisconsin, Madison, 433 Babcock Drive, Madison, WI 53706 USA.

<sup>1</sup>These authors made equal contributions.

## Supplementary Methods

### Synthesis of Ligands for VP35

#### 1. General Procedure for Imine synthesis:

The aldehyde (1 eq.) and aniline (1 eq.) were dissolved in ethanol and stirred at room temperature. When the reaction was complete (0.5-1 h), the mixture was filtered and rinsed with cold ethanol to afford the desired imine.

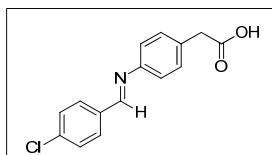

**Imine 1:**  $^1\text{H}$  NMR (500 MHz,  $\text{CDCl}_3$ )  $\delta$  8.42 (s, 1H), 7.84 (d,  $J = 8.4$  Hz, 2H), 7.45 (d,  $J = 8.4$  Hz, 2H), 7.32 (d,  $J = 8.2$  Hz, 2H), 7.19 (d,  $J = 8.3$  Hz, 2H), 3.69 (s, 2H).

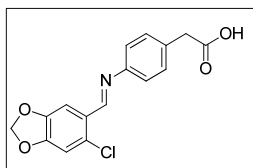

**Imine 2:**  $^1\text{H}$  NMR (500 MHz,  $\text{CDCl}_3$ )  $\delta$  8.79 (s, 1H), 7.70 (s, 1H), 7.31 (d,  $J = 7.7$  Hz, 2H), 7.18 (d,  $J = 7.6$  Hz, 2H), 6.87 (s, 1H), 6.05 (s, 2H), 3.65 (s, 2H).

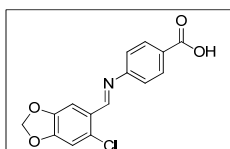

**Imine 3 (LM-133-107):**  $^1\text{H}$  NMR (500 MHz,  $\text{DMSO-}d_6$ )  $\delta$  12.91 (s, 1H), 8.74 (d,  $J = 2.3$  Hz, 1H), 7.98 (dd,  $J = 8.3, 2.0$  Hz, 2H), 7.59 (d,  $J = 2.3$  Hz, 1H), 7.31 (dd,  $J = 8.3, 1.9$  Hz, 2H), 7.27 (d,  $J = 2.4$  Hz, 1H), 6.20 (s, 2H).

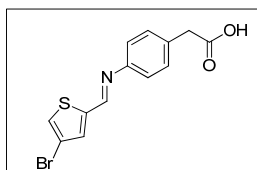

**Imine 4:**  $^1\text{H}$  NMR (500 MHz,  $\text{CDCl}_3$ )  $\delta$  8.49 (s, 1H), 7.38 (d,  $J = 5.8$  Hz, 1H), 7.31 (d,  $J = 8.1$  Hz, 2H), 7.19 (d,  $J = 8.2$  Hz, 2H), 3.68 (s, 2H).

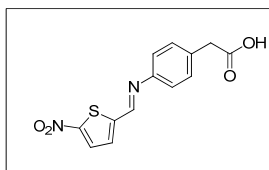

**Imine 5:**  $^1\text{H}$  NMR (500 MHz,  $\text{CDCl}_3$ )  $\delta$  8.54 (s, 1H), 7.92 (d,  $J = 4.2$  Hz, 1H), 7.37 (d,  $J = 4.2$  Hz, 1H), 7.35 (d,  $J = 8.2$  Hz, 2H), 7.25 (d,  $J = 8.2$  Hz, 2H), 3.70 (s, 2H).

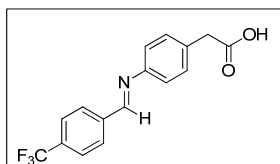

**Imine 6:**  $^1\text{H}$  NMR (500 MHz,  $\text{CDCl}_3$ )  $\delta$  8.50 (s, 1H), 8.01 (d,  $J = 7.7$  Hz, 2H), 7.73 (d,  $J = 7.7$  Hz, 2H), 7.34 (d,  $J = 7.3$  Hz, 2H), 7.22 (d,  $J = 7.2$  Hz, 2H), 3.70 (s, 2H).

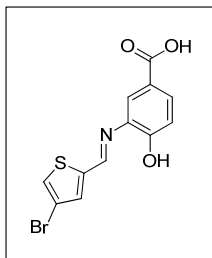

**Imine 7:**  $^1\text{H}$  NMR (400 MHz,  $\text{DMSO}-d_6$ )  $\delta$  12.60 (s, 1H), 10.13 (s, 1H), 8.86 (s, 1H), 7.94 (s, 1H), 7.75 (d,  $J = 1.2$  Hz, 1H), 7.71 – 7.64 (m, 2H), 6.97 (d,  $J = 8.0$  Hz, 1H).

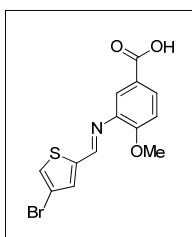

**Imine 8:**  $^1\text{H}$  NMR (500 MHz,  $\text{CDCl}_3$ )  $\delta$  8.58 (s, 1H), 7.99 (d,  $J = 8.6$  Hz, 1H), 7.76 (s, 1H), 7.42 (s, 2H), 7.00 (d,  $J = 8.7$  Hz, 1H), 3.96 (s, 2H).

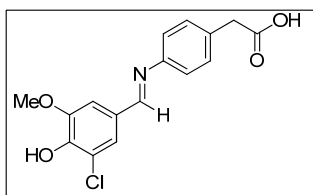

**Imine 9:**  $^1\text{H}$  NMR (400 MHz,  $\text{DMSO}-d_6$ )  $\delta$  12.32 (s, 1H), 8.47 (s, 1H), 7.51 (s, 2H), 7.28 (d,  $J = 8.3$  Hz, 2H), 7.18 (d,  $J = 8.2$  Hz, 2H), 3.91 (s, 3H), 3.58 (s, 2H).

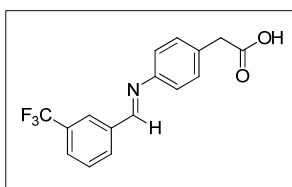

**Imine 10:**  $^1\text{H}$  NMR (400 MHz,  $\text{CDCl}_3$ )  $\delta$  8.50 (s, 1H), 8.19 (s, 1H), 8.07 (d,  $J = 7.9$  Hz, 1H), 7.74 (d,  $J = 7.4$  Hz, 1H), 7.61 (t,  $J = 8.0$  Hz, 1H), 7.34 (d,  $J = 7.2$  Hz, 2H), 7.21 (d,  $J = 7.8$  Hz, 2H), 3.70 (s, 2H).

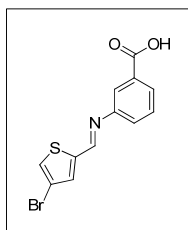

**Imine 11:**  $^1\text{H}$  NMR (500 MHz,  $\text{CDCl}_3$ )  $\delta$  8.55 (s, 1H), 8.00 (d,  $J = 7.3$  Hz, 1H), 7.94 (s, 1H), 7.50 (dt,  $J = 15.7, 7.8$  Hz, 2H), 7.43 (s, 2H).

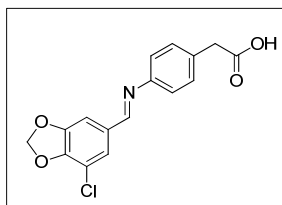

**Imine 12:**  $^1\text{H}$  NMR (400 MHz,  $\text{acetone-}d_6$ )  $\delta$  8.50 (s, 1H), 7.46 (dd,  $J = 5.6, 1.3$  Hz, 1H), 7.36 (d,  $J = 8.4$  Hz, 2H), 7.21 (d,  $J = 8.4$  Hz, 2H), 6.24 (s, 2H), 3.65 (s, 2H).

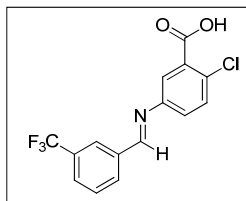

**Imine 13:**  $^1\text{H}$  NMR (500 MHz,  $\text{acetone-}d_6$ )  $\delta$  8.84 (s, 1H), 8.34 (s, 1H), 8.30 (d,  $J = 7.8$  Hz, 1H), 7.91 (d,  $J = 7.7$  Hz, 1H), 7.81 (dd,  $J = 8.9, 5.3$  Hz, 2H), 7.60 (d,  $J = 8.5$  Hz, 1H), 7.52 (dd,  $J = 8.5, 2.6$  Hz, 1H).

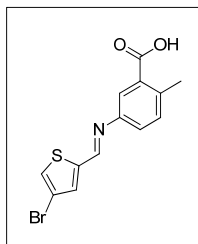

**Imine 14:**  $^1\text{H}$  NMR (500 MHz,  $\text{CD}_3\text{OD}$ )  $\delta$  8.71 (s, 1H), 7.79 (s, 1H), 7.65 (s, 1H), 7.58 (s, 1H), 7.37 – 7.28 (m, 2H), 2.59 (s, 3H).

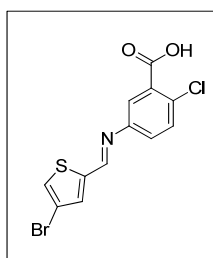

**Imine 15:**  $^1\text{H}$  NMR (500 MHz,  $\text{CD}_3\text{OD}$ )  $\delta$  8.71 (s, 1H), 7.67 (d,  $J = 8.8$  Hz, 1H), 7.60 (s, 1H), 7.50 (s, 1H), 7.38 (dd,  $J = 8.4, 2.6$  Hz, 1H), 6.77 (dd,  $J = 8.6, 2.8$  Hz, 1H).

## 2. Synthesis of pyrrolidinones

General synthetic scheme for preparation of pyrrolidinones

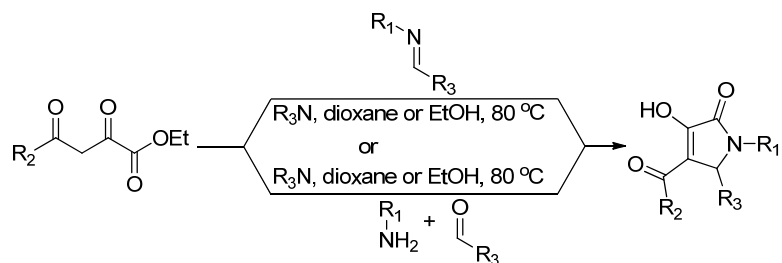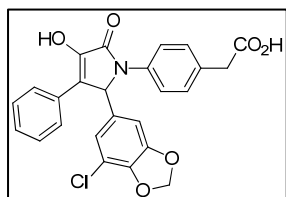

**VPL-001:** Sodium phenylpyruvate (200 mg, 0.9797 mmol) was

partitioned between 1M HCl and EtOAc (3x). The combined organic layers were concentrated to an oil (phenylpyruvic acid). This oil was dissolved in EtOH (3.25 mL), and aminophenylacetic acid (148 mg, 0.9797 mmol, 1 eq) and requisite aldehyde(1) (181 mg, 0.9797 mmol, 1 eq) were added to the mixture. The reaction vial was capped and heated to reflux overnight. The crude reaction mixture was concentrated and purified by chromatography on silica gel (0–100% EtOAc/Hexanes + 1% AcOH) then and recrystallization from EtOH/benzene to afford VPL-001 (60 mg, 13%) as a white solid.

$^1\text{H}$  NMR ( $d_8$ -THF, 500 MHz)  $\delta$  = 10.0 (br s, 1H), 7.79 (d, 2H, J = 7.5 Hz), 7.61 (d, 2H, J = 8.5 Hz), 7.31 (s, 2H), 7.27 (app. t, 2H, J = 7.5 Hz), 7.21 (d, 2H, J = 8.5 Hz), 7.14 (t, 1H, J = 7.0 Hz), 6.74 (s, 1H), 6.51 (d, 2H, J = 6.0 Hz), 5.81 (d, 2H, J = 8.5 Hz), 3.46 (s, 2H).  
ESI  $m/z$ : 463.8 ( $[\text{M}+\text{H}]^+$ ,  $\text{C}_{25}\text{H}_{19}\text{ClNO}_6$  requires 464.1).

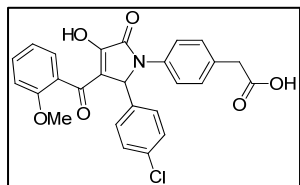

**VPL-002:** Imine 1 (20mg, 0.073mmol), ethyl 4-(2-methoxyphenyl)-2,4-dioxobutanoate (18mg, 0.073mmol), and triethylamine (0.36mmol) were combined in ethanol and heated to

reflux overnight. The crude reaction mixture was concentrated and partitioned between ethyl acetate and 1N HCl. The organic layer was dried over  $\text{Na}_2\text{SO}_4$  and concentrated under reduced pressure. The product precipitated out of a 10% THF/hexanes mixture to afford the desired product (5mg) as and off white solid.

$^1\text{H}$  NMR (500 MHz,  $\text{cd}_3\text{cn}$ )  $\delta$  7.45 (d,  $J = 8.4$  Hz, 2H), 7.42 – 7.38 (m, 1H), 7.19 (d,  $J = 8.3$  Hz, 2H), 7.09 (d,  $J = 4.2$  Hz, 2H), 7.06 (d,  $J = 8.4$  Hz, 2H), 6.96 (d,  $J = 8.4$  Hz, 1H), 6.90 (t,  $J = 7.4$  Hz, 1H), 5.96 (s, 1H), 3.74 (s, 3H), 3.53 (s, 2H). ESI  $m/z$ : 477.8 ( $[\text{M}+\text{H}]^+$ ,  $\text{C}_{26}\text{H}_{20}\text{ClNO}_6$  requires 478.0).

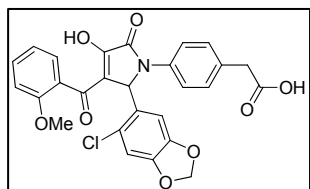

**VPL-003:** Imine 2 (43mg, 0.135mmol), ethyl 4-(2-methoxyphenyl)-2, 4-dioxobutanoate, (34mg, 0.135mmol), and triethylamine (0.677 mmol) were combined in ethanol and

heated to reflux overnight. The crude reaction mixture was concentrated and partitioned between ethyl acetate and 1N HCl. The organic layer was dried over  $\text{Na}_2\text{SO}_4$ , concentrated under reduced pressure, and purified by chromatography (0–100% Hexanes/Ethyl Acetate followed by 95% EtOAc, 2.5%  $\text{H}_2\text{O}$ , 2.5% formic acid) to afford the desired product (6.6 mg off white solid).

$^1\text{H}$  NMR (400 MHz,  $\text{cd}_3\text{cn}$ )  $\delta$  7.40 (d,  $J = 7.0$  Hz, 2H), 7.22 (d,  $J = 7.9$  Hz, 2H), 7.06 (d,  $J = 7.6$  Hz, 1H), 6.98 (d,  $J = 8.4$  Hz, 1H), 6.90 (t,  $J = 7.1$  Hz, 1H), 6.66 (s, 1H), 6.58 (s, 1H), 6.43 (s, 1H), 5.90 (d,  $J = 6.9$  Hz, 2H), 3.78 (s, 3H), 3.55 (s, 2H). ESI  $m/z$ : 519.8 ( $[\text{M}-\text{H}]^-$ ,  $\text{C}_{27}\text{H}_{20}\text{ClNO}_8$  requires 520.0).

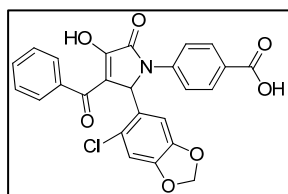

**VPL-004:** Imine 3 (65mg, 0.213mmol), ethyl 2, 4-dioxo-4-phenylbutanoate (47 mg, 0.213mmol), and triethylamine (1.067 mmol) were combined in ethanol and heated to reflux overnight.

The crude reaction mixture was concentrated and partitioned between ethyl acetate and



1N HCl. The organic layer was dried over Na<sub>2</sub>SO<sub>4</sub> and concentrated under reduced pressure and purified by chromatography on silica gel (0–100% Hexanes/Ethyl Acetate followed by 95% EtOAc, 2.5% H<sub>2</sub>O, 2.5% formic acid) to afford the desired product (17 mg tan solid).

<sup>1</sup>H NMR (400 MHz, cd<sub>3</sub>od) δ 7.88 (d, *J* = 8.3 Hz, 1H), 7.72 (d, *J* = 7.7 Hz, 1H), 7.58 (d, *J* = 8.3 Hz, 1H), 7.40 – 7.35 (m, 1H), 7.35 – 7.29 (m, 1H), 6.65 (s, 1H), 6.57 (s, 1H), 6.47 (s, 1H), 5.83 (s, 1H). ESI *m/z*: 477.7 ([M+H]<sup>+</sup>, C<sub>25</sub>H<sub>16</sub>ClNO<sub>7</sub> requires 478.0).

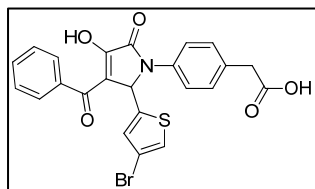

**VPL-005:** Imine 4 (15 mg, 0.0454 mmol), ethyl 2, 4-dioxo-4-phenylbutanoate (10 mg, 0.0454 mmol), and diisopropylamine (0.231 mmol) were combined in ethanol and heated to reflux

overnight. The crude reaction mixture was concentrated and partitioned between ethyl acetate and 1N HCl. The organic layer was dried over Na<sub>2</sub>SO<sub>4</sub>, concentrated under reduced pressure, and purified by chromatography on silica gel (0–100% Hexanes/Ethyl Acetate followed by 95% EtOAc, 2.5% H<sub>2</sub>O, 2.5% formic acid) to afford the desired product (4.4 mg tan solid). The compound had very poor solubility in most organic solvents, including DMSO. NMR is very difficult to interpret due to poor solubility.

<sup>1</sup>H NMR (500 MHz, dmsO) δ 8.42 (s, 2H), 7.79 (d, *J* = 5.8 Hz, 1H), 7.48 (d, *J* = 2.0 Hz, 1H), 7.32 (dd, *J* = 16.5, 6.8 Hz, 2H), 7.23 (s, 2H), 6.95 (s, 1H), 6.27 (s, 1H). ESI *m/z*: 495.6 ([M-H]<sup>-</sup>, C<sub>23</sub>H<sub>16</sub>BrNO<sub>5</sub>S requires 496.0).

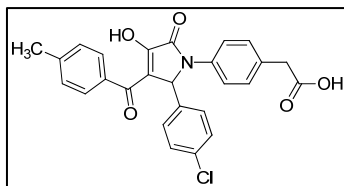

**VPL-006:** Imine 1, (110mg, 0.402mmol), ethyl 2, 4-dioxo-4-(p-tolyl)butanoate (100mg, 0.402mmol), and triethylamine (2.0mmol) were combined in dioxane and heated to reflux

overnight. The crude reaction mixture was concentrated and partitioned between ethyl acetate and 1N HCl. The organic layer was dried over  $\text{Na}_2\text{SO}_4$ , concentrated under reduced pressure and purified by chromatography on silica gel (0–100% Hexanes/Ethyl Acetate followed by 95% EtOAc, 2.5%  $\text{H}_2\text{O}$ , 2.5% formic acid) to afford the desired product (63mg tan solid).

$^1\text{H}$  NMR (500 MHz,  $\text{cd}_3\text{cn}$ )  $\delta$  7.66 (d,  $J$  = 8.1 Hz, 2H), 7.50 (d,  $J$  = 8.4 Hz, 2H), 7.33 (d,  $J$  = 8.5 Hz, 2H), 7.25 (d,  $J$  = 7.8 Hz, 1H), 7.22 (d,  $J$  = 8.5 Hz, 1H), 7.18 (d,  $J$  = 8.5 Hz, 2H), 6.17 (s, 1H), 3.54 (s, 2H), 2.38 (s, 3H). ESI  $m/z$ : 460.8 ( $[\text{M}-\text{H}]^-$ ,  $\text{C}_{26}\text{H}_{20}\text{ClNO}_5$  requires 460.0).

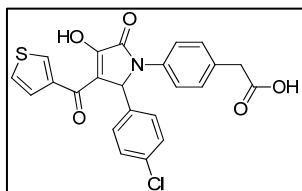

**VPL-007:** Imine 1 (12mg, 0.044 mmol), ethyl 2, 4-dioxo-4-(thiophen-3-yl)butanoate (10mg, 0.044mmol), and triethylamine (0.22 mmol) were combined in ethanol and heated to reflux

overnight. The crude reaction mixture was concentrated and partitioned between dichloromethane and 1N HCl. The organic layer was dried over  $\text{Na}_2\text{SO}_4$  and concentrated under reduced pressure and purified by chromatography (0–100% Hexanes/Ethyl Acetate followed by 95% EtOAc, 2.5%  $\text{H}_2\text{O}$ , 2.5% formic acid) to afford the desired product (4.5mg tan solid).

$^1\text{H}$  NMR (400 MHz,  $\text{cd}_3\text{cn}$ )  $\delta$  8.36 (s, 1H), 7.49 (d,  $J = 7.9$  Hz, 2H), 7.45 (d,  $J = 4.5$  Hz, 1H), 7.37 (s, 1H), 7.33 (d,  $J = 7.7$  Hz, 2H), 7.20 (dd,  $J = 14.5, 8.2$  Hz, 4H), 6.15 (s, 1H), 3.55 (s, 2H). ESI  $m/z$ : 451.7 ( $[\text{M}-\text{H}]^-$ ,  $\text{C}_{23}\text{H}_{16}\text{ClNO}_5\text{S}$  requires 452.0).

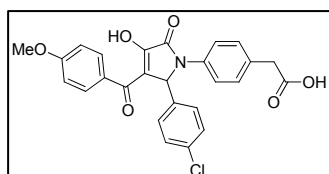

**VPL-008:** Imine 1 (58 mg, 0.212 mmol), ethyl 4-(4-methoxyphenyl)-2,4-dioxobutanoate (53 mg, 0.212 mmol), triethylamine (110mg, 1.09 mmol) were combined in dioxane

and heated to 80 °C overnight. The crude reaction mixture was concentrated and partitioned between dichloromethane and 1N HCl. The organic layer was dried over  $\text{Na}_2\text{SO}_4$  and concentrated under reduced pressure and purified by chromatography (0–100% Hexanes/Ethyl Acetate followed by 95% EtOAc, 2.5%  $\text{H}_2\text{O}$ , 2.5% formic acid) to afford the desired product (34mg white solid).

$^1\text{H}$  NMR (500 MHz,  $\text{CD}_3\text{CN}$ )  $\delta$  7.78 (dd,  $J = 8.7, 1.8$  Hz, 2H), 7.56 – 7.45 (m, 2H), 7.33 (d,  $J = 6.9$  Hz, 2H), 7.22 (dd,  $J = 8.6, 1.4$  Hz, 1H), 7.18 (dd,  $J = 7.4, 1.0$  Hz, 1H), 6.95 (dd,  $J = 8.6, 1.3$  Hz, 2H), 6.19 (s, 1H), 3.85 (s, 2H), 3.55 (s, 1H). ESI  $m/z$ : 476.8 ( $[\text{M}-\text{H}]^-$ ,  $\text{C}_{26}\text{H}_{20}\text{ClNO}_6$  requires 476.1).

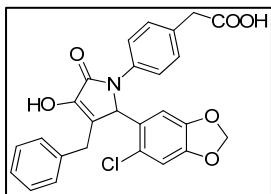

**VPL-009:** Prepared analogously to VPL-001: Purification ( $\text{SiO}_2$ , 0–70% EtOAc/Hex + 1% AcOH) afforded product mixed with other impurities. This mixture was suspended in 1:1 MeCN/ $\text{H}_2\text{O}$  and a white precipitate formed. The solid was collected as pure product (9 mg, 4%).

$^1\text{H}$  NMR ( $d_8$ -THF, 500 MHz)  $\delta$  =10.80 (br s, 1H), 9.01 (br s, 1H), 7.51 (d, 2H,  $J$  = 8.5 Hz), 7.17–7.13 (m, 5H), 7.09 (m, 1H), 6.80 (s, 1H), 6.30 (s, 1H), 5.91 (s, 1H), 5.85 (s, 2H), 3.68 (d, 1H,  $J$  = 14.5 Hz), 3.41 (s, 2H), 3.17 (d, 1H,  $J$  = 14.5 Hz). ESI  $m/z$ : 477.8 ( $[\text{M}+\text{H}]^+$ ,  $\text{C}_{26}\text{H}_{21}\text{ClNO}_6$  requires 478.1).

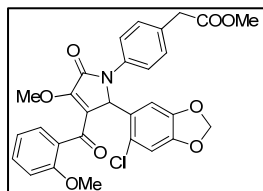

**VPL-010:** To a dry scintillation vial under nitrogen was added VPL-003 (19mg, 0.0364mmol). This was suspended in 1ml of dichloromethane and 7eq. of methanol. 100ul of trimethylsilyldiazomethane (2.0 M solution in hexanes) was added and the reaction was stirred at room temperature. The solvent was evaporated under reduced pressure. Purification ( $\text{SiO}_2$ , 0–10% MeOH/dichloromethane) afforded the desired product.

$^1\text{H}$  NMR (500 MHz,  $\text{CDCl}_3$ )  $\delta$  7.49 (d,  $J$  = 8.5 Hz, 2H), 7.47 – 7.42 (m, 1H), 7.29 (d,  $J$  = 7.5 Hz, 1H), 7.23 (d,  $J$  = 8.4 Hz, 2H), 6.96 (t,  $J$  = 7.5 Hz, 1H), 6.91 (d,  $J$  = 8.4 Hz, 2H), 6.59 (s, 1H), 6.47 (s, 1H), 6.40 (s, 1H), 5.89 (d,  $J$  = 11.8 Hz, 2H), 4.01 (s, 3H), 3.84 (s, 3H), 3.57 (s, 2H), 3.49 (s, 3H). ESI  $m/z$ : 535.8 ( $[\text{M}+\text{H}]^+$ ,  $\text{C}_{29}\text{H}_{24}\text{ClNO}_8$  requires 549.8).

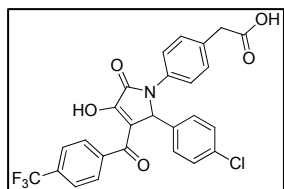

**VPL-011:** Imine 1 (11.6 mg, 0.0423 mmol), ethyl 2, 4-dioxo-4-(4-(trifluoromethyl) phenyl)butanoate (12.2 mg, 0.0423 mmol), diisopropylethylamine (0.211 mmol), were dissolved in dioxane and heated to 80 °C for 2 days. The crude reaction mixture was concentrated and partitioned between dichloromethane and 1N HCl. The organic layer was dried over  $\text{Na}_2\text{SO}_4$  and concentrated under reduced pressure and purified by chromatography (0–

100% Hexanes/Ethyl Acetate followed by 95% EtOAc, 2.5% H<sub>2</sub>O, 2.5% formic acid) to afford the desired product (4.8mg white solid).

<sup>1</sup>H NMR (400 MHz, CD<sub>3</sub>CN) δ 7.84 (d, *J* = 8.3 Hz, 2H), 7.71 (d, *J* = 8.3 Hz, 2H), 7.50 (d, *J* = 8.3 Hz, 2H), 7.35 (d, *J* = 8.3 Hz, 12H), 7.20 (t, *J* = 8.4 Hz, 4H), 6.11 (s, 1H), 3.54 (s, 2H). ESI *m/z*: 513.8 ([M-H]<sup>+</sup>, C<sub>26</sub>H<sub>17</sub>ClF<sub>3</sub>N<sub>2</sub>O<sub>5</sub> requires 514.0).

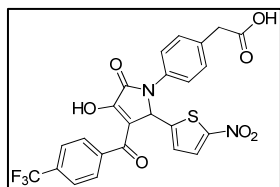

**VPL-012:** Imine 5 (10 mg, 0.0346 mmol), ethyl 2, 4-dioxo-4-(4-(trifluoromethyl) phenyl)butanoate (10 mg, 0.0346 mmol), and diisopropylethylamine (0.17 mmol) were dissolved in dioxane and

heated to 80 °C overnight. The crude reaction mixture was concentrated and partitioned between dichloromethane and 1N HCl. The organic layer was concentrated and dried over Na<sub>2</sub>SO<sub>4</sub> and concentrated under reduced pressure and purified by chromatography (0–100% Hexanes/Ethyl Acetate followed by 95% EtOAc, 2.5% H<sub>2</sub>O, 2.5% formic acid) to afford the desired product (3.2 mg white solid).

<sup>1</sup>H NMR (400 MHz, CD<sub>3</sub>CN) δ 7.90 (d, *J* = 7.9 Hz, 1H), 7.74 (d, *J* = 8.0 Hz, 1H), 7.63 (d, *J* = 3.9 Hz, 1H), 7.51 (d, *J* = 8.3 Hz, 1H), 7.28 (d, *J* = 8.4 Hz, 1H), 7.15 (d, *J* = 3.5 Hz, 1H), 6.44 (s, 1H), 3.58 (s, 1H). ESI *m/z*: 530.7 ([M-H]<sup>+</sup>, C<sub>24</sub>H<sub>15</sub>F<sub>3</sub>N<sub>2</sub>O<sub>7</sub>S requires 531.0).

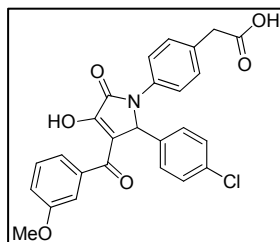

**VPL-013:** Imine 1 (47 mg, 0.17 mmol), ethyl 4-(3-methoxyphenyl)-2,4-dioxobutanoate (43 mg, 0.17 mmol), and triethylamine (0.86

mmol) were dissolved in dioxane and heated to 80 °C overnight. The crude reaction mixture was concentrated and partitioned between dichloromethane and 1N HCl. The organic layer was concentrated and dried over Na<sub>2</sub>SO<sub>4</sub> and concentrated under reduced pressure and purified by chromatography (0–100% Hexanes/Ethyl Acetate followed by 95% EtOAc, 2.5% H<sub>2</sub>O, 2.5% formic acid) to afford the desired product (2.3 mg white solid).

<sup>1</sup>H NMR (500 MHz, CD<sub>3</sub>CN) δ 7.49 (d, *J* = 8.2 Hz, 2H), 7.36 – 7.27 (m, 4H), 7.21 (d, *J* = 8.6 Hz, 3H), 7.17 (d, *J* = 8.2 Hz, 2H), 7.10 (d, *J* = 7.3 Hz, 1H), 6.15 (s, 1H), 3.79 (s, 3H), 3.54 (s, 2H). ESI *m/z*: 475.8 ([M-H]<sup>+</sup>, C<sub>26</sub>H<sub>20</sub>ClNO<sub>6</sub> requires 476.1).

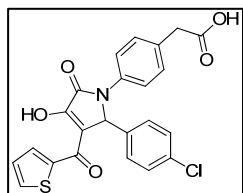

**VPL-014**; Imine 1 (32.5 mg, 0.118 mmol), ethyl 2, 4-dioxo-4-(thiophen-2-yl) butanoate (26.85 mg, 0.118 mmol), and triethylamine (0.59 mmol) were dissolved in ethanol and heated to 80 °C overnight.

The crude reaction mixture was concentrated and partitioned between dichloromethane and 1N HCl. The organic layer was concentrated and dried over Na<sub>2</sub>SO<sub>4</sub> and concentrated under reduced pressure and purified by chromatography (0–100% Hexanes/Ethyl Acetate followed by 95% EtOAc, 2.5% H<sub>2</sub>O, 2.5% formic acid) to afford the desired product (15.3mg white solid).

<sup>1</sup>H NMR (500 MHz, CD<sub>3</sub>CN) δ 8.14 (d, *J* = 2.0 Hz, 1H), 7.73 (d, *J* = 4.6 Hz, 1H), 7.48 (d, *J* = 8.2 Hz, 2H), 7.33 (d, *J* = 8.2 Hz, 2H), 7.19 (dd, *J* = 15.9, 8.2 Hz, 4H), 7.13 (s, 1H), 6.14 (s, 1H), 3.54 (s, 3H). ESI *m/z*: 451.8 ([M-H]<sup>+</sup>, C<sub>23</sub>H<sub>16</sub>ClNO<sub>5</sub>S requires 452.0)

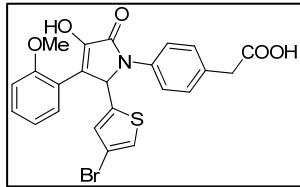

**VPL-015:** Prepared analogously to VPL-001.

$^1\text{H NMR}$  ( $d_6$ -acetone, 500 MHz)  $\delta$  = 7.69 (d, 1H,  $J$  = 7.5 Hz), 7.66 (d, 2H,  $J$  = 7.5 Hz), 7.30 (d, 2H,  $J$  = 8.0 Hz), 7.26 (d, 1H,  $J$  = 8.0 Hz), 7.25 (s, 1H), 7.11 (s, 1H), 7.03 (d, 1H,  $J$  = 8.5 Hz), 6.96 (t, 1H,  $J$  = 7.5 Hz), 6.90 (s, 1H), 3.96 (s, 3H), 3.58 (s, 2H). ESI  $m/z$ : 497.6 ( $[\text{M}-\text{H}]^-$ ,  $\text{C}_{23}\text{H}_{17}\text{BrNO}_5\text{S}$  requires 498.0).

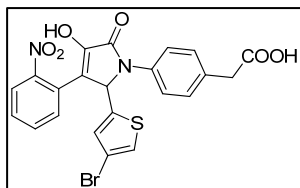

**VPL-016:** Prepared analogously to VPL-001:  $^1\text{H NMR}$  ( $d_4$ -MeOH, 500 MHz)  $\delta$  = 7.95 (d, 1H,  $J$  = 8.0 Hz), 7.65 (dd, 1H,  $J$  = 7.0, 7.5 Hz), 7.55 (d, 1H,  $J$  = 8.0 Hz), 7.52 (m, 3H), 7.31 (d, 2H,  $J$  = 8.5 Hz), 7.20 (s, 1H), 7.00 (s, 1H), 6.58 (s, 1H), 3.59 (s, 2H). ESI  $m/z$ : 512.7 ( $[\text{M}-\text{H}]^-$ ,  $\text{C}_{22}\text{H}_{14}\text{BrN}_2\text{O}_6\text{S}$  requires 513.0).

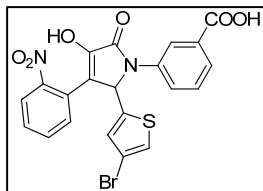

**VPL-017:** Prepared analogously to VPL-001. Upon standing, the product precipitated out of solution as a brown solid (115 mg, 24%).

$^1\text{H NMR}$  ( $d_8$ -THF, 500 MHz)  $\delta$  = 11.48 (br s, 1H), 9.95 (br s, 1H), 8.26 (s, 1H), 7.92 (d, 2H,  $J$  = 8.0 Hz), 7.77 (d, 1H,  $J$  = 7.5 Hz), 7.63–7.57 (m, 2H), 7.47 (app. t, 1H,  $J$  = 8.0 Hz), 7.41 (app. t, 1H,  $J$  = 8.0 Hz), 7.22 (s, 1H), 7.11 (s, 1H), 6.62 (s, 1H). ESI  $m/z$ : 498.6 ( $[\text{M}-\text{H}]^-$ ,  $\text{C}_{21}\text{H}_{12}\text{BrN}_2\text{O}_6\text{S}$  requires 499.0).

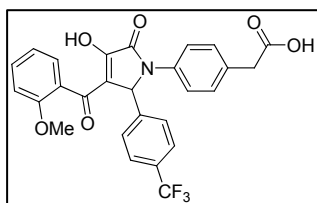

**VPL-018:** Imine 6 (10.4 mg, 0.0338 mmol), ethyl 4-(2-methoxyphenyl)-2, 4-dioxobutanoate (8.5 mg, 0.0338 mmol),

and diisopropylethylamine (0.169 mmol) were dissolved in ethanol and heated to 80 °C overnight. The crude reaction mixture was concentrated and partitioned between dichloromethane and 1N HCl. The organic layer was concentrated and dried over Na<sub>2</sub>SO<sub>4</sub> and concentrated under reduced pressure and purified by chromatography (0–100% Hexanes/Ethyl Acetate followed by 95% EtOAc, 2.5% H<sub>2</sub>O, 2.5% formic acid) to afford the desired product (2.5mg white solid).

<sup>1</sup>H NMR (500 MHz, , CD<sub>3</sub>CN) δ 7.47 (d, *J* = 8.3 Hz, 2H), 7.41 (d, *J* = 7.7 Hz, 3H), 7.29 (d, *J* = 8.0 Hz, 2H), 7.20 (d, *J* = 8.2 Hz, 2H), 7.07 (d, *J* = 7.2 Hz, 1H), 6.95 (d, *J* = 8.4 Hz, 1H), 6.89 (t, *J* = 7.4 Hz, 1H), 6.07 (s, 1H), 3.72 (s, 3H), 3.53 (s, 2H). ESI *m/z*: 509.8 ([M–H]<sup>–</sup>, C<sub>27</sub>H<sub>20</sub>F<sub>3</sub>NO<sub>6</sub> requires 510.1).

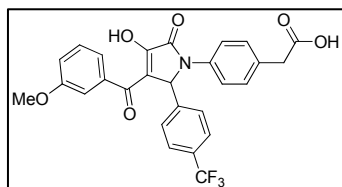

**VPL-019:** Imine 6 (10.5 mg, 0.0341 mmol), ethyl 4-(3-methoxyphenyl)-2,4-dioxobutanoate (8.5 mg, 0.0341 mmol), and diisopropylethylamine (0.17 mmol) were dissolved in

ethanol and heated to 80 °C overnight. The crude reaction mixture was concentrated and partitioned between dichloromethane and 1N HCl. The organic layer was concentrated and dried over Na<sub>2</sub>SO<sub>4</sub> and concentrated under reduced pressure and purified by chromatography (0–100% Hexanes/Ethyl Acetate followed by 95% EtOAc, 2.5% H<sub>2</sub>O, 2.5% formic acid) to afford the desired product (2.9mg white solid).



$^1\text{H}$  NMR (500 MHz,  $\text{CD}_3\text{CN}$ )  $\delta$  7.56 (d,  $J = 8.1$  Hz, 2H), 7.51 (t,  $J = 8.4$  Hz, 3H), 7.34 (dt,  $J = 21.4, 6.7$  Hz, 3H), 7.25 – 7.19 (m, 3H), 7.11 (d,  $J = 8.9$  Hz, 1H), 6.24 (s, 1H), 3.80 (s, 3H), 3.54 (s, 2H). ESI  $m/z$ : 509.8 ( $[\text{M}-\text{H}]^-$ ,  $\text{C}_{27}\text{H}_{20}\text{F}_3\text{NO}_6$  requires 510.1).

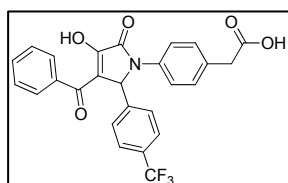

**VPL-020:** Imine 6 (25 mg, 0.0813 mmol), ethyl 2,4-dioxo-4-phenylbutanoate (18mg, 0.0813 mmol), and triethylamine (0.406 mmol) were dissolved in ethanol and heated to 80 °C overnight.

The crude reaction mixture was concentrated and partitioned between dichloromethane and 1N HCl. The organic layer was concentrated and dried over  $\text{Na}_2\text{SO}_4$  and concentrated under reduced pressure and purified by chromatography (0–100% Hexanes/Ethyl Acetate followed by 95% EtOAc, 2.5%  $\text{H}_2\text{O}$ , 2.5% formic acid) to afford the desired product (19.6mg white solid).

$^1\text{H}$  NMR (500 MHz,  $\text{thf}-d_8$ )  $\delta$  7.80 (d,  $J = 3.6$  Hz, 2H), 7.65 (d,  $J = 8.2$  Hz, 2H), 7.49 (bs, 2H), 7.44 – 7.33 (m, 3H), 7.32 – 7.23 (m, 3H), 7.18 (d,  $J = 8.1$  Hz, 2H), 6.25 (s, 1H), 3.43 (s, 2H). ESI  $m/z$ : 479.8 ( $[\text{M}-\text{H}]^-$ ,  $\text{C}_{26}\text{H}_{18}\text{F}_3\text{NO}_5$  requires 480.1).

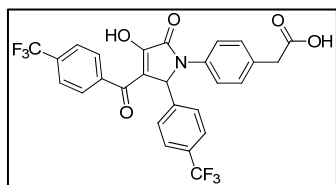

**VPL-021:** Imine 6 (11mg, 0.0346), ethyl 2,4-dioxo-4-(4-(trifluoromethyl)phenyl)butanoate (10 mg, 0.0346 mmol), and diisopropylethylamine (0.173 mmol) were dissolved in dioxane

and heated to 80 °C overnight. The crude reaction mixture was concentrated and partitioned between dichloromethane and 1N HCl. Heavy precipitate formed in the

organic layer, which was filtered and rinsed with cold hexanes to afford the desired product as white solid. (5.8mg)

$^1\text{H}$  NMR (500 MHz, ,  $\text{CD}_3\text{CN}$ )  $\delta$  7.85 (d,  $J$  = 8.0 Hz, 2H), 7.75 (d,  $J$  = 8.2 Hz, 2H), 7.58 (d,  $J$  = 8.1 Hz, 2H), 7.52 (d,  $J$  = 8.3 Hz, 4H), 7.23 (d,  $J$  = 8.4 Hz, 2H), 6.24 (s, 1H), 3.55 (s, 2H). ESI  $m/z$ : 547.8 ( $[\text{M}-\text{H}]^-$ ,  $\text{C}_{27}\text{H}_{17}\text{F}_6\text{NO}_5$  requires 548.1)

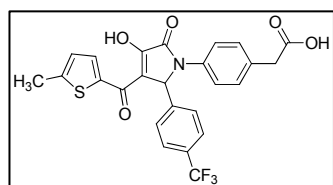

**VPL-022:** Imine 6 (20 mg, 0.065 mmol), ethyl 4-(5-methylthiophen-2-yl)-2,4-dioxobutanoate (15.6 mg, 0.065 mmol), and diisopropylethylamine (0.325 mmol) were dissolved

in ethanol and heated to 80 °C overnight. The crude reaction mixture was concentrated and partitioned between dichloromethane and 1N HCl. The organic layer was concentrated and dried over  $\text{Na}_2\text{SO}_4$  and concentrated under reduced pressure and purified by chromatography (0–100% Hexanes/Ethyl Acetate followed by 95% EtOAc, 2.5%  $\text{H}_2\text{O}$ , 2.5% formic acid) to afford the desired product (14.4mg white solid).

$^1\text{H}$  NMR (400 MHz,  $\text{CD}_3\text{CN}$ )  $\delta$  7.99 (d,  $J$  = 3.1 Hz, 1H), 7.52 (dd,  $J$  = 19.6, 8.6 Hz, 6H), 7.21 (d,  $J$  = 8.5 Hz, 2H), 6.84 (d,  $J$  = 2.7 Hz, 1H), 6.20 (s, 1H), 3.54 (s, 2H), 2.47 (s, 3H). ESI  $m/z$ : 499.8 ( $[\text{M}-\text{H}]^-$ ,  $\text{C}_{25}\text{H}_{18}\text{F}_3\text{NO}_5\text{S}$  requires 520.1)

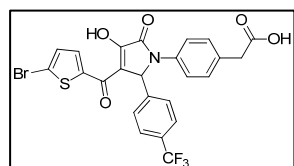

**VPL-023:** Imine 6 (20 mg, 0.065 mmol), ethyl 4-(5-bromothiophen-2-yl)-2,4-dioxobutanoate (20 mg, 0.065 mmol), and diisopropylethylamine (0.325 mmol) were dissolved in ethanol

and heated to 80 °C overnight. The crude reaction mixture was concentrated and

partitioned between dichloromethane and 1N HCl. The organic layer was concentrated and dried over Na<sub>2</sub>SO<sub>4</sub> and concentrated under reduced pressure and purified by chromatography (0–100% Hexanes/Ethyl Acetate followed by 95% EtOAc, 2.5% H<sub>2</sub>O, 2.5% formic acid) to afford the desired product (19.5 mg white solid).

<sup>1</sup>H NMR (400 MHz, , CD<sub>3</sub>CN) δ 8.10 (s, 1H), 7.55 (d, *J* = 8.6 Hz, 2H), 7.51 (d, *J* = 8.2 Hz, 3H), 7.21 (d, *J* = 8.2 Hz, 3H), 7.17 (d, *J* = 3.6 Hz, 1H), 6.16 (s, 1H), 3.54 (s, 2H). ESI *m/z*: 563.6 ([M–H]<sup>–</sup>, C<sub>24</sub>H<sub>15</sub>BrF<sub>3</sub>NO<sub>5</sub>S requires 563.9)

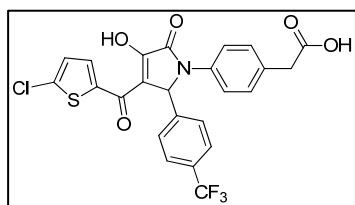

**VPL-024:** Imine 6 (20 mg, 0.065 mmol), ethyl 4-(5-chlorothiophen-2-yl)-2,4-dioxobutanoate (17 mg, 0.065 mmol), and diisopropylethylamine (0.325 mmol) were

dissolved in ethanol and heated to 80 °C overnight. The crude reaction mixture was concentrated and partitioned between dichloromethane and 1N HCl. The organic layer was concentrated and dried over Na<sub>2</sub>SO<sub>4</sub> and concentrated under reduced pressure and purified by chromatography (0–100% Hexanes/Ethyl Acetate followed by 95% EtOAc, 2.5% H<sub>2</sub>O, 2.5% formic acid) to afford the desired product (24 mg white solid).

<sup>1</sup>H NMR (400 MHz, thf) δ 10.84 (s, 1H), 8.01 (s, 1H), 7.61 (d, *J* = 7.5 Hz, 1H), 7.56 (d, *J* = 7.6 Hz, 1H), 7.48 (d, *J* = 7.6 Hz, 1H), 7.20 (d, *J* = 8.4 Hz, 1H), 7.04 (s, 1H), 6.29 (s, 1H), 3.45 (s, 2H). ESI *m/z*: 519.7 ([M–H]<sup>–</sup>, C<sub>24</sub>H<sub>15</sub>ClF<sub>3</sub>NO<sub>5</sub>S requires 520.0)

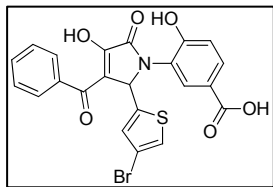

**VPL-025:** Imine 7 (22 mg, 0.0676 mmol), ethyl 2,4-dioxo-4-phenylbutanoate (14.9 mg, 0.0676 mmol), and diisopropylethylamine (0.325 mmol) were dissolved in ethanol and

heated to 80 °C overnight. The crude reaction mixture was concentrated and partitioned between dichloromethane and 1N HCl. The organic layer was concentrated and dried over Na<sub>2</sub>SO<sub>4</sub> and concentrated under reduced pressure and purified by chromatography (0–100% Hexanes/Ethyl Acetate followed by 95% EtOAc, 2.5% H<sub>2</sub>O, 2.5% formic acid) to afford the desired product (9.8 mg white solid).

<sup>1</sup>H NMR (400 MHz, thf) δ 9.63 (s, 1H), 7.91 (s, 2H), 7.87 (d, *J* = 5.7 Hz, 2H), 7.77 (d, *J* = 8.3 Hz, 1H), 7.50 (dt, *J* = 19.1, 9.9 Hz, 2H), 7.39 (t, *J* = 7.1 Hz, 2H), 7.14 (s, 1H), 6.90 (d, *J* = 8.4 Hz, 2H), 6.62 (s, 1H). ESI *m/z*: 497.7 ([M–H]<sup>–</sup>, C<sub>22</sub>H<sub>14</sub>BrNO<sub>6</sub>S requires 497.97)

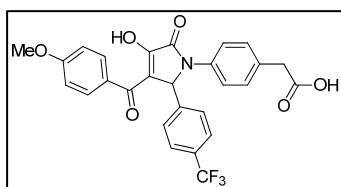

**VPL-026:** Imine 6 (12.3mg, 0.04mmol), ethyl 4-(4-methoxyphenyl)-2,4-dioxobutanoate (10 mg, 0.04mmol), and diisopropylethylamine (0.2mmol) were dissolved in ethanol

and heated to 80 °C overnight. The crude reaction mixture was concentrated and partitioned between dichloromethane and 1N HCl. The organic layer was concentrated and dried over Na<sub>2</sub>SO<sub>4</sub> and concentrated under reduced pressure and purified by chromatography (0–100% Hexanes/Ethyl Acetate followed by 95% EtOAc, 2.5% H<sub>2</sub>O, 2.5% formic acid) to afford the desired product (5.1 mg white solid).

$^1\text{H}$  NMR (500 MHz,  $\text{CD}_3\text{CN}$ )  $\delta$  7.78 (d,  $J = 8.7$  Hz, 2H), 7.56 (d,  $J = 8.2$  Hz, 2H), 7.51 (t,  $J = 9.3$  Hz, 4H), 7.22 (d,  $J = 8.3$  Hz, 2H), 6.94 (d,  $J = 8.7$  Hz, 2H), 6.27 (s, 1H), 3.84 (s, 3H), 3.54 (s, 2H). ESI  $m/z$ : 509.8 ( $[\text{M}-\text{H}]^-$ ,  $\text{C}_{27}\text{H}_{20}\text{F}_3\text{NO}_6$  requires 510.2)

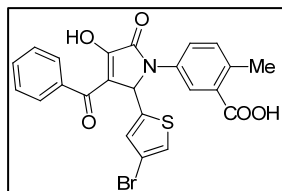

**VPL-027:** Ethyl 2,4-dioxo-4-phenylbutanoate (61 mg, 0.188 mmol, 2 equiv) and imine 14 (20.7 mg, 0.094 mmol, 1 equiv) were suspended in EtOH (0.73 mL) and  $\text{Et}_3\text{N}$  (0.065 mL, 5 equiv) was

added. The reaction was heated at  $80^\circ\text{C}$  overnight. The crude reaction mixture was concentrated and purified by chromatography ( $\text{SiO}_2$ , 0–20% MeOH/DCM + 1% AcOH) to afford the desired product.

Poor solubility properties prevent interpretation of the  $^1\text{H}$  NMR.

ESI  $m/z$ : 495.7 ( $[\text{M}-\text{H}]^-$ ,  $\text{C}_{23}\text{H}_{15}\text{BrNO}_5\text{S}$  requires 496.0).

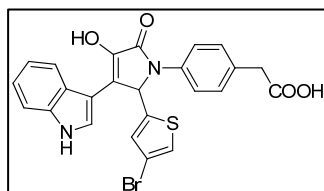

**VPL-028:** Prepared analogously to VPL-001. The crude product purified by chromatography ( $\text{SiO}_2$ , 0–3% MeOH/dichloromethane +1% AcOH) to afford the desired

product mixed with 4-aminophenylacetic acid. This mixture was dissolved in EtOAc and extracted with satd. aq.  $\text{NaHCO}_3$ . The organic layer was removed, and the aqueous layer was heated. Upon cooling to room temperature, the desired product precipitated out of solution as fine plate-like crystals.

$^1\text{H}$  NMR ( $d_4$ -MeOH, 500 MHz)  $\delta$  = 8.06 (d, 1H,  $J$  = 8.0 Hz), 7.52 (s, 1H), 7.45 (m, 2H), 7.33 (m, 3H), 7.11 (t, 1H,  $J$  = 7.0 Hz), 7.08 (s, 1H), 7.07 (s, 1H), 7.04 (t, 1H,  $J$  = 8.0 Hz), 6.55 (s, 1H), 3.46 (s, 2H). ESI  $m/z$ : 506.7 ( $[\text{M}-\text{H}]^-$ ,  $\text{C}_{24}\text{H}_{16}\text{BrN}_2\text{O}_4\text{S}$  requires 507.0).

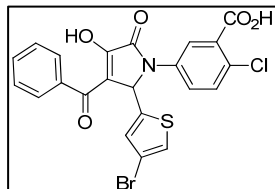

**VPL-029:** Ethyl 2,4-dioxo-4-phenylbutanoate (21.8 mg, 0.0990 mmol) was combined with imine 14 (136 mg, 0.3960 mmol) and *N,N*-diisopropylethylamine (0.086 mL, 0.4950 mmol) in EtOH (0.5 mL) and the mixture was heated at reflux overnight. The resulting mixture was concentrated and purified by chromatography ( $\text{SiO}_2$ , 0–20% MeOH/DCM +1% AcOH). The resulting fractions containing product were combined and concentrated. The product was precipitated out of a 10% THF/MeOH mixture to afford the desired product (6.0 mg) as a very insoluble white solid.

$^1\text{H}$  NMR ( $d_6$ -DMSO, 600 MHz)  $\delta$  = 7.90 (br s, 1H), 7.76 (d, 2H,  $J$  = 6.6 Hz), 7.47 (dd, 1H,  $J$  = 2.4, 9.0 Hz), 7.35 (t, 1H,  $J$  = 7.2 Hz), 7.31–7.27 (m, 5H), 6.98 (s, 1H), 6.28 (s, 1H). ESI  $m/z$ : 515.6 ( $[\text{M}-\text{H}]^-$ ,  $\text{C}_{22}\text{H}_{12}\text{BrClNO}_5\text{S}$  requires 515.9).

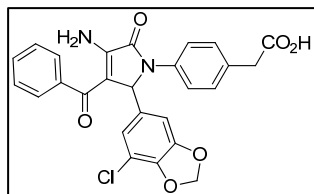

**VPL-030:** GA-228 (9.0 mg, 0.0407 mmol) and ammonium formate (2.2 mg, 0.0732 mmol) were dissolved in 2-methoxyethanol (0.15 mL) and heated at reflux overnight. The resulting mixture was concentrated and purified by chromatography (0–20% MeOH/DCM) to afford the desired product (4.0 mg, 44%).

$^1\text{H}$  NMR ( $d_4$ -MeOH, 500 MHz)  $\delta$  = 7.49 (t, 1H,  $J$  = 8.5 Hz), 7.42–7.39 (m, 4H), 7.33 (d, 2H,  $J$  = 7.5 Hz), 7.25 (d, 2H,  $J$  = 8.5 Hz), 6.15 (s, 1H), 6.03 (s, 1H), 5.99 (s, 1H), 5.86 (s, 1H), 5.83 (s, 1H), 3.49 (s, 2H). ESI  $m/z$ : 488.8 ( $[\text{M}-\text{H}]^-$ ,  $\text{C}_{26}\text{H}_{18}\text{ClN}_2\text{O}_6$  requires 489.1).

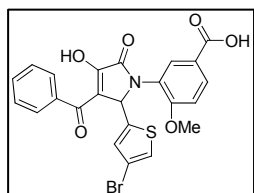

**VPL-031:** Imine 8 (21mg, 0.061mmol), ethyl 2,4-dioxo-4-phenylbutanoate (3.5mg, 0.061 mmol), and diisopropylethylamine (0.305 mmol) were combined in ethanol and heated to reflux

overnight. The crude reaction mixture was concentrated and partitioned between dichloromethane and 1N HCl. The organic layer was dried over  $\text{Na}_2\text{SO}_4$  and concentrated under reduced pressure and purified by chromatography (0–100% Hexanes/Ethyl Acetate followed by 95% EtOAc, 2.5%  $\text{H}_2\text{O}$ , 2.5% formic acid) to afford the desired product (4.5mg tan solid).

$^1\text{H}$  NMR (400 MHz,  $\text{thf}-d_8$ )  $\delta$  7.94 – 7.86 (m, 3H), 7.52 – 7.43 (m, 2H), 7.43 – 7.34 (m, 2H), 7.15 – 7.06 (m, 2H), 6.88 (s, 1H), 6.47 (s, 1H), 3.93 (s, 3H). ESI  $m/z$ : 511.6 ( $[\text{M}-\text{H}]^-$ ,  $\text{C}_{23}\text{H}_{16}\text{BrNO}_6\text{S}$  requires 511.99).

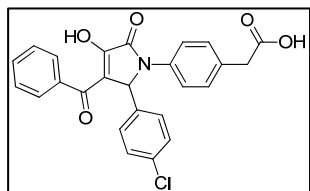

**VPL-032:** Imine 1 (18.4mg, 0.0672mmol), ethyl 2,4-dioxo-4-phenylbutanoate (14.8 mg, 0.0672 mmol), and diisopropylethylamine (0.336 mmol) were combined in ethanol

and heated to reflux overnight. The crude reaction mixture was concentrated and

partitioned between dichloromethane and 1N HCl. The organic layer was dried over  $\text{Na}_2\text{SO}_4$  and concentrated under reduced pressure and purified by chromatography (0–100% Hexanes/Ethyl Acetate followed by 95% EtOAc, 2.5%  $\text{H}_2\text{O}$ , 2.5% formic acid) to afford the desired product (6.2 mg tan solid).

$^1\text{H}$  NMR (400 MHz,  $\text{CD}_3\text{CN}$ )  $\delta$  7.73 (d,  $J$  = 7.3 Hz, 2H), 7.60 – 7.54 (m, 1H), 7.50 (d,  $J$  = 8.4 Hz, 2H), 7.47 – 7.39 (m, 2H), 7.32 (d,  $J$  = 8.0 Hz, 2H), 7.20 (dd,  $J$  = 16.2, 8.2 Hz, 4H), 6.18 (s, 1H), 3.55 (s, 2H). ESI  $m/z$ : 445.8 ( $[\text{M}-\text{H}]^-$ ,  $\text{C}_{25}\text{H}_{18}\text{ClNO}_5$  requires 446.08).

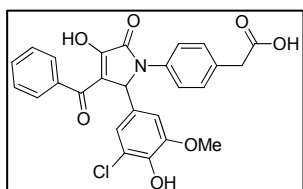

**VPL-033:** Imine 9 (58 mg, 0.18 mmol), ethyl 2,4-dioxo-4-phenylbutanoate (40 mg, 0.18 mmol), and triethylamine (0.9 mmol) were combined in dioxane and heated to reflux

overnight. The crude reaction mixture was concentrated and partitioned between dichloromethane and 1N HCl. The organic layer was dried over  $\text{Na}_2\text{SO}_4$  and concentrated under reduced pressure and purified by chromatography (0–100% Hexanes/Ethyl Acetate followed by 95% EtOAc, 2.5%  $\text{H}_2\text{O}$ , 2.5% formic acid) to afford the desired product (33 mg tan solid).

$^1\text{H}$  NMR (400 MHz,  $\text{CD}_3\text{CN}$ )  $\delta$  7.76 (d,  $J$  = 7.8 Hz, 2H), 7.58 (t,  $J$  = 8.3 Hz, 1H), 7.53 – 7.42 (m, 4H), 7.24 (d,  $J$  = 8.2 Hz, 2H), 6.89 (s, 1H), 6.76 (s, 1H), 6.09 (s, 1H), 3.73 (s, 3H), 3.56 (s, 2H). ESI  $m/z$ : 491.8 ( $[\text{M}-\text{H}]^-$ ,  $\text{C}_{26}\text{H}_{20}\text{ClNO}_7$  requires 492.09).



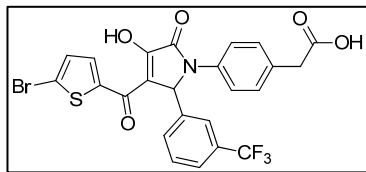

**VPL-034:** Imine 10 (24 mg, 0.078 mmol), ethyl 4-(5-bromothiophen-2-yl)-2,4-dioxobutanoate (11.9 mg, 0.078 mmol), and triethylamine (0.195 mmol) were combined in

dioxane and heated to reflux overnight. The crude reaction mixture was concentrated and partitioned between dichloromethane and 1N HCl. The organic layer was dried over  $\text{Na}_2\text{SO}_4$  and concentrated under reduced pressure and purified by chromatography (0–100% Hexanes/Ethyl Acetate followed by 95% EtOAc, 2.5%  $\text{H}_2\text{O}$ , 2.5% formic acid) to afford the desired product (12.4 mg white solid).

$^1\text{H}$  NMR (400 MHz,  $\text{CD}_3\text{CN}$ )  $\delta$  7.94 (d,  $J$  = 2.7 Hz, 1H), 7.71 (s, 1H), 7.62 (d,  $J$  = 7.7 Hz, 1H), 7.49 (d,  $J$  = 8.0 Hz, 2H), 7.42 – 7.34 (m, 1H), 7.27 – 7.11 (m, 4H), 6.18 (s, 1H), 3.54 (s, 2H). ESI  $m/z$ : 563.6 ( $[\text{M}-\text{H}]^-$ ,  $\text{C}_{24}\text{H}_{15}\text{BrF}_3\text{NO}_6\text{S}$  requires 563.98).

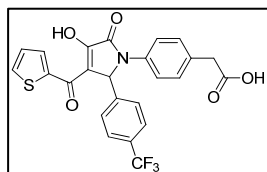

**VPL-035:** Imine 6 (30mg, 0.1mmol), ethyl 2,4-dioxo-4-(thiophen-2-yl)butanoate (11.2 mg, 0.05mmol), and triethylamine (0.25 mmol) were combined in dioxane and heated to reflux overnight. The

crude reaction mixture was concentrated and partitioned between dichloromethane and 1N HCl. The organic layer was dried over  $\text{Na}_2\text{SO}_4$  and concentrated under reduced pressure and purified by chromatography (0–100% Hexanes/Ethyl Acetate followed by 95% EtOAc, 2.5%  $\text{H}_2\text{O}$ , 2.5% formic acid) followed by a trituration with DCM to afford the desired product (8.9 mg white solid).

$^1\text{H}$  NMR (500 MHz, acetone)  $\delta$  9.36 (s, 1H), 7.71 (d,  $J$  = 7.6 Hz, 2H), 7.57 (d,  $J$  = 7.7 Hz, 2H), 7.53 (d,  $J$  = 3.2 Hz, 2H), 7.44 (bs, 2H), 7.24 (d,  $J$  = 7.1 Hz, 2H), 7.03 (s, 1H), 6.15 (s, 1H), 3.54 (s, 2H).

ESI  $m/z$ : 485.8 ( $[\text{M}-\text{H}]^-$ ,  $\text{C}_{24}\text{H}_{16}\text{F}_3\text{NO}_5\text{S}$  requires 486.07).

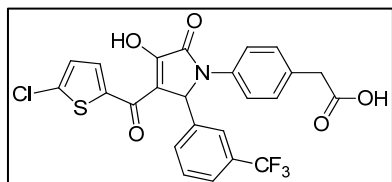

**VPL-036:** Imine 10 (26mg, 0.084mmol), ethyl 4-(5-chlorothiophen-2-yl)-2,4-dioxobutanoate (11 mg, 0.042 mmol), and triethylamine (0.21 mmol) were combined in

dioxane and heated to reflux overnight. The crude reaction mixture was concentrated and partitioned between dichloromethane and 1N HCl. The organic layer was dried over  $\text{Na}_2\text{SO}_4$  and concentrated under reduced pressure and purified by chromatography (0–100% Hexanes/Ethyl Acetate followed by 95% EtOAc, 2.5%  $\text{H}_2\text{O}$ , 2.5% formic acid) followed by a trituration with DCM to afford the desired product (4.4 mg white solid).

$^1\text{H}$  NMR (500 MHz, acetone)  $\delta$  8.14 (d,  $J$  = 4.0 Hz, 1H), 7.85 (s, 1H), 7.74 (d,  $J$  = 7.5 Hz, 1H), 7.66 (d,  $J$  = 8.3 Hz, 2H), 7.50 (d,  $J$  = 8.0 Hz, 1H), 7.49 – 7.43 (m, 1H), 7.28 (d,  $J$  = 8.3 Hz, 2H), 7.17 (d,  $J$  = 4.1 Hz, 1H), 6.41 (s, 1H), 3.56 (s, 2H). ESI  $m/z$ : 519.7 ( $[\text{M}-\text{H}]^-$ ,  $\text{C}_{24}\text{H}_{15}\text{ClF}_3\text{NO}_5\text{S}$  requires 520.0).

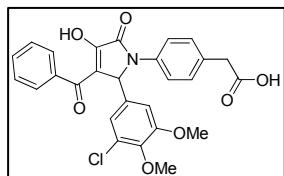

**VPL-037:** 4-aminophenyl acetic acid (27mg, 0.18mmol), 3-chloro-4, 5-dimethoxybenzaldehyde (36 mg, 0.18 mmol), ethyl 2,4-dioxo-

4-phenylbutanoate (20mg, 0.09mmol), and triethylamine (0.9 mmol) were combined in 2 ml of ethanol and heated at reflux overnight. The crude reaction mixture was concentrated and partitioned between dichloromethane and 1N HCl. The organic layer was dried over Na<sub>2</sub>SO<sub>4</sub> and concentrated under reduced pressure and purified by chromatography (0–100% Hexanes/Ethyl Acetate followed by 95% EtOAc, 2.5% H<sub>2</sub>O, 2.5% formic acid) to afford the desired product (16.2mg white solid).

<sup>1</sup>H NMR (500 MHz, acetone) δ 7.89 (d, *J* = 7.3 Hz, 2H), 7.68 (d, *J* = 8.4 Hz, 2H), 7.62 – 7.53 (m, 1H), 7.48 (t, *J* = 7.3 Hz, 2H), 7.30 (d, *J* = 8.3 Hz, 2H), 7.14 (d, *J* = 9.2 Hz, 2H), 6.30 (s, 1H), 3.79 (s, 3H), 3.64 (s, 3H), 3.58 (s, 2H).

ESI *m/z*: 505.8 ([M–H]<sup>–</sup>, C<sub>27</sub>H<sub>22</sub>ClNO<sub>7</sub> requires 506.1).

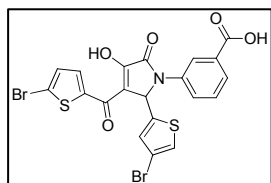

**VPL-038:** Imine 11 (18.1 mg, 0.058 mmol), ethyl 4-(5-bromothiophen-2-yl)-2,4-dioxobutanoate (8.9 mg, 0.029 mmol), and triethylamine (0.145 mmol) were combined in ethanol and heated to

reflux overnight. The crude reaction mixture was concentrated and partitioned between dichloromethane and 1N HCl. The organic layer was dried over Na<sub>2</sub>SO<sub>4</sub> and concentrated under reduced pressure and purified by chromatography (0–100% Hexanes/Ethyl Acetate followed by 95% EtOAc, 2.5% H<sub>2</sub>O, 2.5% formic acid) to afford the desired product (3.8 mg white solid). Compound had very poor solubility in most organic solvents.

$^1\text{H}$  NMR (500 MHz, acetone- $d_6$ )  $\delta$  8.96 (s, 1H), 8.44 (d,  $J = 1.2$  Hz, 1H), 7.93 (d,  $J = 5.1$  Hz, 1H), 7.84 (d,  $J = 6.7$  Hz, 1H), 7.60 – 7.41 (m, 1H), 7.12 (d,  $J = 10.9$  Hz, 3H), 6.53 (s, 1H). ESI  $m/z$ : 565.5 ( $[\text{M}-\text{H}]^-$ ,  $\text{C}_{20}\text{H}_{11}\text{Br}_2\text{NO}_5\text{S}_2$  requires 565.8).

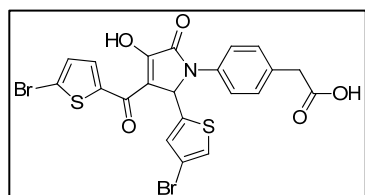

**VPL-039:** Imine 4 (40 mg, 0.12 mmol), ethyl 4-(5-bromothiophen-2-yl)-2,4-dioxobutanoate (37.6 mg, 0.12 mmol), and triethylamine (0.617 mmol) were combined in

dioxane and heated at reflux overnight. The crude reaction mixture was concentrated and partitioned between dichloromethane and 1N HCl. The organic layer was dried over  $\text{Na}_2\text{SO}_4$  and concentrated under reduced pressure and purified by chromatography (0–100% Hexanes/Ethyl Acetate followed by 95% EtOAc, 2.5%  $\text{H}_2\text{O}$ , 2.5% formic acid) followed precipitation from ethyl acetate and hexanes to afford the desired product (21.2 mg white solid).

$^1\text{H}$  NMR (500 MHz, acetone- $d_6$ )  $\delta$  8.31 (s, 1H), 7.66 (dd,  $J = 11.5, 8.3$  Hz, 2H), 7.33 (d,  $J = 7.2$  Hz, 2H), 7.22 (d,  $J = 23.7$  Hz, 3H), 6.56 (s, 1H), 3.61 (s, 2H). ESI  $m/z$ : 579.5 ( $[\text{M}-\text{H}]^-$ ,  $\text{C}_{21}\text{H}_{13}\text{Br}_2\text{NO}_5\text{S}_2$  requires 579.8).

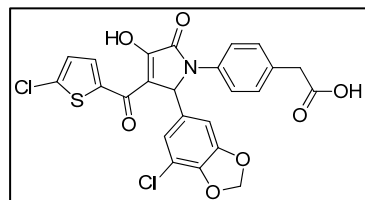

**VPL-040:** Imine 12 (73 mg, 0.23 mmol), ethyl 4-(5-chlorothiophen-2-yl)-2,4-dioxobutanoate (30 mg, 0.115 mmol), and triethylamine (0.575 mmol) were combined in

dioxane and heated to reflux overnight. The crude reaction mixture was concentrated and partitioned between dichloromethane and 1N HCl. The organic layer was dried

over Na<sub>2</sub>SO<sub>4</sub> and concentrated under reduced pressure and purified by chromatography (0–100% Hexanes/Ethyl Acetate followed by 95% EtOAc, 2.5% H<sub>2</sub>O, 2.5% formic acid) followed precipitation from tetrahydrofuran and toluene to afford the desired product (12.1 mg white solid).

<sup>1</sup>H NMR (500 MHz, acetone-*d*<sub>6</sub>) δ 9.22 (s, 1H), 7.71 (d, *J* = 7.9 Hz, 2H), 7.27 (d, *J* = 6.8 Hz, 2H), 7.20 – 7.06 (m, 1H), 6.93 (d, *J* = 19.3 Hz, 2H), 6.74 (s, 1H), 5.96 (s, 2H), 3.57 (s, 2H). ESI *m/z*: 529.7 ([M–H]<sup>–</sup>, C<sub>24</sub>H<sub>15</sub>Cl<sub>2</sub>NO<sub>7</sub>S requires 529.99).

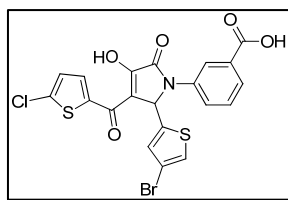

**VPL-041:** Imine 11 (71mg, 0.23mmol), ethyl 4-(5-chlorothiophen-2-yl)-2,4-dioxobutanoate -diketoester (30 mg, 0.115 mmol), and triethylamine (0.575 mmol) were combined in ethanol and heated to reflux overnight. The crude reaction mixture was concentrated and partitioned between dichloromethane and 1N HCl. The organic layer was dried over Na<sub>2</sub>SO<sub>4</sub> and concentrated under reduced pressure and purified by chromatography (0–100% Hexanes/Ethyl Acetate followed by 95% EtOAc, 2.5% H<sub>2</sub>O, 2.5% formic acid) followed precipitation from ethyl acetate:hexanes to afford the desired product (9.8 mg off-white solid).

<sup>1</sup>H NMR (500 MHz, acetone-*d*<sub>6</sub>) δ 8.38 (s, 1H), 8.19 (d, *J* = 0.8 Hz, 1H), 7.92 (d, *J* = 7.8 Hz, 1H), 7.87 (d, *J* = 7.4 Hz, 1H), 7.54 (t, *J* = 7.8 Hz, 1H), 7.31 (s, 1H), 7.26 (s, 1H), 7.20 (s, 1H), 6.73 (s, 1H). ESI *m/z*: 521.6 ([M–H]<sup>–</sup>, C<sub>20</sub>H<sub>11</sub>BrClNO<sub>5</sub>S<sub>2</sub> requires 521.9).

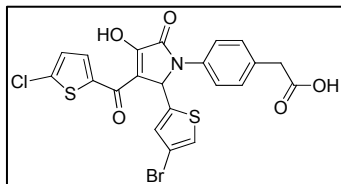

**VPL-042:** 4-aminophenyl acetic acid (59 mg, 0.38 mmol), 4-bromo-2-thiophenecarboxaldehyde (73 mg, 0.38 mmol), ethyl 4-(5-chlorothiophen-2-yl)-2,4-dioxobutanoate (50 mg, 0.19

mmol), and triethylamine (97 mg, 0.96 mmol) were combined in 2 ml of dioxane and heated at reflux overnight. The crude reaction mixture was concentrated and partitioned between dichloromethane and 1N HCl. The organic layer was dried over Na<sub>2</sub>SO<sub>4</sub> and concentrated under reduced pressure and purified by chromatography (0–100% Hexanes/Ethyl Acetate followed by 95% EtOAc, 2.5% H<sub>2</sub>O, 2.5% formic acid) followed precipitation from ethyl acetate:hexanes to afford the desired product (22.6 mg white solid).

<sup>1</sup>H NMR (500 MHz, acetone-*d*<sub>6</sub>) δ 8.18 (s, 1H), 7.65 (d, *J* = 8.5 Hz, 2H), 7.35 (d, *J* = 8.4 Hz, 2H), 7.31 (s, 1H), 7.25 (s, 1H), 7.20 (d, *J* = 3.0 Hz, 1H), 6.62 (s, 1H), 3.62 (s, 2H). ESI *m/z*: 535.6 ([*M*–H]<sup>–</sup>, C<sub>21</sub>H<sub>13</sub>BrClNO<sub>5</sub>S<sub>2</sub> requires 535.9).

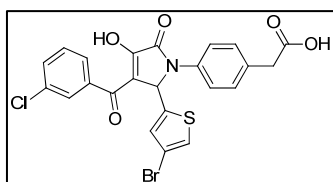

**VPL-043:** 4-aminophenyl acetic acid (59 mg, 0.38 mmol), 4-bromo-2-thiophenecarboxaldehyde (73 mg, 0.38 mmol), ethyl 4-(3-chlorophenyl)-2,4-dioxobutanoate (50 mg, 0.19 mmol),

and triethylamine (97 mg, 0.96 mmol) were combined in 2 ml of dioxane and heated at reflux overnight. The crude reaction mixture was concentrated and partitioned between dichloromethane and 1N HCl. The organic layer was dried over Na<sub>2</sub>SO<sub>4</sub> and concentrated under reduced pressure and purified by chromatography (0–100%

Hexanes/Ethyl Acetate followed by 95% EtOAc, 2.5% H<sub>2</sub>O, 2.5% formic acid) followed precipitation from acetone to afford the desired product (13.4 mg yellow solid).

<sup>1</sup>H NMR (500 MHz, thf) δ 7.85 (s, 1H), 7.78 (d, *J* = 7.6 Hz, 1H), 7.62 (d, *J* = 8.3 Hz, 2H), 7.55 (d, *J* = 7.9 Hz, 1H), 7.43 (t, *J* = 7.8 Hz, 1H), 7.28 (d, *J* = 8.3 Hz, 2H), 7.19 (s, 1H), 7.15 (s, 1H), 6.56 (s, 1H), 3.58 (s, 2H). ESI *m/z*: 529.6 ([*M*-H]<sup>-</sup>, C<sub>23</sub>H<sub>15</sub>BrClNO<sub>5</sub>S requires 529.9).

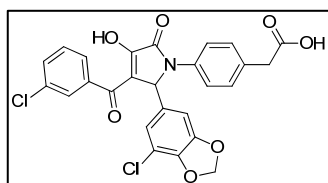

**VPL-044:** 4-aminophenyl acetic acid (59mg, 0.393mmol), 7-chlorobenzo[d][1,3]dioxole-5-carbaldehyde (72mg, 0.393mmol), ethyl 4-(3-chlorophenyl)-2,4-dioxobutanoate

(50mg, 0.19mmol), and triethylamine (97mg, 0.96mmol) were combined in 2ml of dioxane and heated at reflux overnight. The crude reaction mixture was concentrated and partitioned between dichloromethane and 1N HCl. The organic layer was dried over Na<sub>2</sub>SO<sub>4</sub> and concentrated under reduced pressure and purified by chromatography (0–100% Hexanes/Ethyl Acetate followed by 95% EtOAc, 2.5% H<sub>2</sub>O, 2.5% formic acid) to afford the desired product (17.1 mg white solid).

<sup>1</sup>H NMR (500 MHz, acetone-*d*<sub>6</sub>) δ 7.87 (d, *J* = 1.6 Hz, 1H), 7.84 (d, *J* = 7.7 Hz, 1H), 7.67 (d, *J* = 8.5 Hz, 2H), 7.62 (d, *J* = 7.9 Hz, 1H), 7.54 – 7.48 (m, 1H), 7.32 (d, *J* = 8.5 Hz, 2H), 7.13 (s, 1H), 6.99 (s, 1H), 6.25 (s, 1H), 6.00 (d, *J* = 4.0 Hz, 2H), 3.60 (s, 2H). ESI *m/z*: 523.7 ([*M*-H]<sup>-</sup>, C<sub>26</sub>H<sub>17</sub>Cl<sub>2</sub>NO<sub>7</sub> requires 524.0).

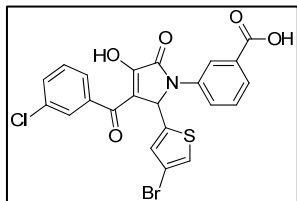

**VPL-045:** 3-aminobenzoic acid (54 mg, 0.393 mmol), 4-bromo-2-thiophenecarboxaldehyde (75 mg, 0.393 mmol), ethyl 4-(3-chlorophenyl)-2,4-dioxobutanoate (50 mg, 0.19 mmol), and triethylamine (97 mg, 0.96 mmol) were combined in 2ml of dioxane and heated at reflux overnight. The crude reaction mixture was concentrated and partitioned between dichloromethane and 1N HCl. The organic layer was dried over Na<sub>2</sub>SO<sub>4</sub> and concentrated under reduced pressure and purified by chromatography (0–100% Hexanes/Ethyl Acetate followed by 95% EtOAc, 2.5% H<sub>2</sub>O, 2.5% formic acid) to afford the desired product (15.8 mg white solid).

<sup>1</sup>H NMR (500 MHz, thf-*d*<sub>8</sub>) δ 8.35 (s, 1H), 7.87 (d, *J* = 7.9 Hz, 2H), 7.80 (t, *J* = 8.6 Hz, 2H), 7.55 (d, *J* = 7.9 Hz, 1H), 7.43 (t, *J* = 7.8 Hz, 2H), 7.20 (s, 1H), 7.16 (s, 1H), 6.64 (s, 1H). ESI *m/z*: 515.6 ([M–H]<sup>–</sup>, C<sub>22</sub>H<sub>13</sub> BrClNO<sub>5</sub>S requires 515.9).

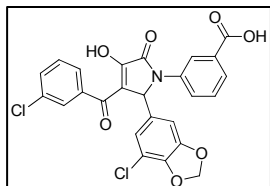

**VPL-046:** 3-aminobenzoic acid (54 mg, 0.39 mmol), 7-chlorobenzo[d][1,3]dioxole-5-carbaldehyde (72 mg, 0.39 mmol),  $\alpha$ -diketoester (50 mg, 0.19 mmol), and triethylamine (97 mg, 0.96 mmol) were combined in 2 ml of dioxane and heated at reflux overnight. The crude reaction mixture was concentrated and partitioned between dichloromethane and 1N HCl. The organic layer was dried over Na<sub>2</sub>SO<sub>4</sub> and concentrated under reduced pressure and purified by chromatography (0–100% Hexanes/Ethyl Acetate followed by 95% EtOAc, 2.5% H<sub>2</sub>O, 2.5% formic acid) to afford the desired product.



$^1\text{H}$  NMR (500 MHz, acetone- $d_6$ )  $\delta$  8.42 (s, 1H), 7.97 – 7.87 (m, 2H), 7.83 (dd,  $J$  = 14.3, 7.6 Hz, 2H), 7.62 (d,  $J$  = 7.4 Hz, 1H), 7.51 (dd,  $J$  = 15.4, 7.6 Hz, 2H), 7.15 (s, 1H), 7.03 (s, 1H), 6.34 (s, 1H), 5.99 (d,  $J$  = 4.7 Hz, 2H). ESI  $m/z$ : 509.7 ( $[\text{M}-\text{H}]^-$ ,  $\text{C}_{25}\text{H}_{15}\text{Cl}_2\text{NO}_7$  requires 510.0).

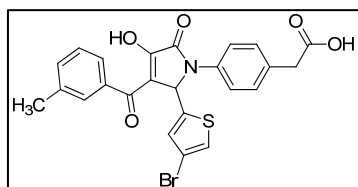

**VPL-047:** 4-aminophenyl acetic acid (65 mg, 0.43 mmol), 4-bromo-2-thiophenecarboxaldehyde (82 mg, 0.43 mmol), ethyl 2, 4-dioxo-4-(*m*-tolyl)butanoate (50 mg, 0.213 mmol), and triethylamine (1.07 mmol) were combined in 2ml of dioxane and heated at reflux overnight. The crude reaction mixture was concentrated and partitioned between dichloromethane and 1N HCl. The organic layer was dried over  $\text{Na}_2\text{SO}_4$  and concentrated under reduced pressure and purified by chromatography (0–100% Hexanes/Ethyl Acetate followed by 95% EtOAc, 2.5%  $\text{H}_2\text{O}$ , 2.5% formic acid) and rinsed with ether to afford the desired product.

$^1\text{H}$  NMR (500 MHz, acetone- $d_6$ )  $\delta$  7.69 (dd,  $J$  = 12.8, 7.3 Hz, 4H), 7.46 – 7.37 (m, 2H), 7.35 (d,  $J$  = 8.4 Hz, 2H), 7.23 (s, 1H), 6.68 (s, 1H), 3.62 (s, 3H), 2.39 (s, 3H). ESI  $m/z$ : 509.7 ( $[\text{M}-\text{H}]^-$ ,  $\text{C}_{24}\text{H}_{18}\text{BrNO}_5\text{S}$  requires 510.0).

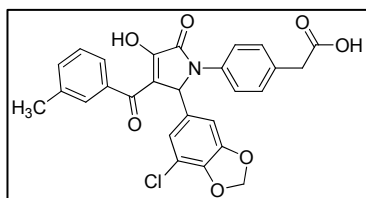

**VPL-048:** 4-aminophenyl acetic acid (65 mg, 0.43 mmol), 7-chlorobenzo[*d*][1,3]dioxole-5-carbaldehyde (79 mg, 0.427 mmol), ethyl 2,4-dioxo-4-(*m*-tolyl)butanoate (50 mg, 0.213

mmol), and triethylamine (1.07 mmol) were combined in 2ml of dioxane and heated at reflux overnight. The crude reaction mixture was concentrated and partitioned between dichloromethane and 1N HCl. The organic layer was dried over Na<sub>2</sub>SO<sub>4</sub> and concentrated under reduced pressure and purified by chromatography (0–100% Hexanes/Ethyl Acetate followed by 95% EtOAc, 2.5% H<sub>2</sub>O, 2.5% formic acid) to afford the desired product.

<sup>1</sup>H NMR (500 MHz, acetone-*d*<sub>6</sub>) δ 7.74 – 7.65 (m, 4H), 7.41 (d, J = 7.1 Hz, 1H), 7.37 (d, J = 7.7 Hz, 1H), 7.32 (d, J = 8.1 Hz, 2H), 7.09 (s, 1H), 6.94 (s, 1H), 6.27 (s, 1H), 6.01 (d, J = 4.4 Hz, 2H), 3.61 (s, 2H), 2.39 (s, 3H). ESI *m/z*: 503.8 ([M–H]<sup>–</sup>, C<sub>27</sub>H<sub>20</sub>ClNO<sub>7</sub> requires 504.0).

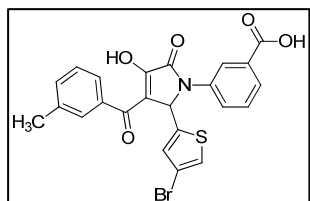

**VPL-049:** 3-aminobenzoic acid (59 mg, 0.427 mmol), 4-bromo-2-thiophenecarboxaldehyde (82 mg, 0.43 mmol), ethyl 2,4-dioxo-4-(*m*-tolyl)butanoate (50 mg, 0.213 mmol), and triethylamine (1.07 mmol) were combined in 2 ml of dioxane and heated at reflux

overnight. The crude reaction mixture was concentrated and partitioned between dichloromethane and 1N HCl. The organic layer was dried over Na<sub>2</sub>SO<sub>4</sub> and concentrated under reduced pressure and purified by chromatography (0–100% Hexanes/Ethyl Acetate followed by 95% EtOAc, 2.5% H<sub>2</sub>O, 2.5% formic acid) to afford the desired product.

$^1\text{H}$  NMR (500 MHz, acetone- $d_6$ )  $\delta$  8.41 (d,  $J$  = 2.8 Hz, 1H), 7.97 – 7.90 (m, 1H), 7.90 – 7.83 (m, 1H), 7.71 (d,  $J$  = 4.6 Hz, 2H), 7.55 (dd,  $J$  = 13.3, 7.7 Hz, 1H), 7.46 – 7.35 (m, 2H), 7.32 (d,  $J$  = 4.3 Hz, 1H), 7.26 (d,  $J$  = 4.3 Hz, 1H), 6.79 (d,  $J$  = 5.2 Hz, 1H), 2.39 (d,  $J$  = 4.9 Hz, 3H). ESI  $m/z$ : 495.7 ( $[\text{M}-\text{H}]^-$ ,  $\text{C}_{23}\text{H}_{16}\text{BrNO}_5\text{S}$  requires 495.99).

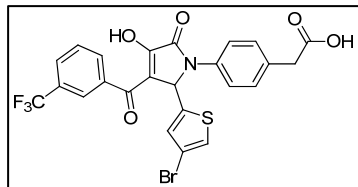

**VPL-050:** 4-aminophenyl acetic acid (52.4 mg, 0.347 mmol), 4-bromo-2-thiophenecarboxaldehyde (66.3 mg, 0.347 mmol), ethyl 2,4-dioxo-4-(3-(trifluoromethyl)phenyl)butanoate (50

mg, 0.173 mmol), and triethylamine (1.07 mmol) were combined in 2 ml of dioxane and heated at reflux overnight. The crude reaction mixture was concentrated and partitioned between dichloromethane and 1N HCl. The organic layer was dried over  $\text{Na}_2\text{SO}_4$  and concentrated under reduced pressure and purified by chromatography (0–100% Hexanes/Ethyl Acetate followed by 95% EtOAc, 2.5%  $\text{H}_2\text{O}$ , 2.5% formic acid) to afford the desired product.

$^1\text{H}$  NMR (400 MHz, acetone- $d_6$ )  $\delta$  8.17 (d,  $J$  = 7.7 Hz, 2H), 7.95 (d,  $J$  = 7.7 Hz, 1H), 7.77 (t,  $J$  = 7.7 Hz, 1H), 7.67 (d,  $J$  = 8.3 Hz, 2H), 7.36 (d,  $J$  = 8.3 Hz, 2H), 7.32 (s, 1H), 7.29 (s, 1H), 6.68 (s, 1H), 3.62 (s, 2H). ESI  $m/z$ : 563.6 ( $[\text{M}-\text{H}]^-$ ,  $\text{C}_{24}\text{H}_{15}\text{BrF}_3\text{NO}_5\text{S}$  requires 563.98).

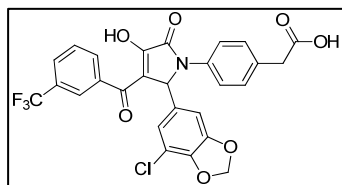

**VPL-051:** 4-aminophenylacetic acid (52 mg, 0.35mmol), 7-chlorobenzo[d][1,3]dioxole-5-carbaldehyde (64mg, 0.35mmol), ethyl 2,4-dioxo-4-(3-(trifluoromethyl)phenyl)butanoate (50 mg,

0.17 mmol), and triethylamine (97 mg, 0.96 mmol) were combined in 2ml of dioxane and heated at reflux overnight. The crude reaction mixture was concentrated and partitioned between dichloromethane and 1N HCl. The organic layer was dried over Na<sub>2</sub>SO<sub>4</sub> and concentrated under reduced pressure and purified by chromatography (0–100% Hexanes/Ethyl Acetate followed by 95% EtOAc, 2.5% H<sub>2</sub>O, 2.5% formic acid) to afford the desired product.

<sup>1</sup>H NMR (500 MHz, acetone-*d*<sub>6</sub>) δ 8.17 (d, *J* = 7.2 Hz, 2H), 7.93 (d, *J* = 7.7 Hz, 1H), 7.73 (t, *J* = 7.6 Hz, 1H), 7.68 (d, *J* = 8.5 Hz, 2H), 7.32 (d, *J* = 8.4 Hz, 2H), 7.14 (s, 1H), 7.01 (s, 1H), 6.28 (s, 1H), 5.99 (d, *J* = 3.1 Hz, 2H), 3.59 (s, 2H). ESI *m/z*: 557.7 ([M–H]<sup>–</sup>, C<sub>27</sub>H<sub>17</sub>ClF<sub>3</sub>NO<sub>7</sub> requires 558.0).

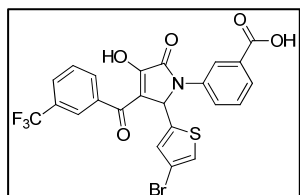

**VPL-052:** Imine 11 (54mg, 0.17mmol), ethyl 2,4-dioxo-4-(3-(trifluoromethyl)phenyl)butanoate (50 mg, 0.17 mmol), and triethylamine (0.87 mmol) were combined in dioxane and heated

to reflux overnight. The crude reaction mixture was concentrated and partitioned between dichloromethane and 1N HCl. The organic layer was dried over Na<sub>2</sub>SO<sub>4</sub> and concentrated under reduced pressure and purified by chromatography (0–100% Hexanes/Ethyl Acetate followed by 95% EtOAc, 2.5% H<sub>2</sub>O, 2.5% formic acid) followed precipitation from ethyl acetate:hexanes to afford the desired product.

<sup>1</sup>H NMR (500 MHz, acetone-*d*<sub>6</sub>) δ 8.41 (s, 1H), 8.18 (d, *J* = 8.4 Hz, 2H), 7.95 (t, *J* = 8.7 Hz, 2H), 7.87 (d, *J* = 7.7 Hz, 1H), 7.77 (t, *J* = 7.6 Hz, 1H), 7.55 (t, *J* = 7.9 Hz, 1H), 7.32

(d,  $J = 9.8$  Hz, 1H), 6.77 (s, 1H). ESI  $m/z$ : 549.6 ( $[M-H]^-$ ,  $C_{23}H_{13}BrF_3NO_5S$  requires 549.96).

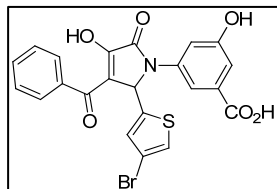

**VPL-053:** Prepared analogously to VPL-001. The crude reaction mixture was concentrated, and partitioned between DCM and 1M HCl (3x). Upon standing, a light colored precipitate fell out of the organic extract. The tan solid was collected via filtration. LC/MS and <sup>1</sup>H NMR revealed this precipitate to be the desired product (18.8 mg, 17%).

<sup>1</sup>H NMR ( $d_4$ -MeOH, 500 MHz)  $\delta = 7.82$  (d, 2H,  $J = 8.0$  Hz), 7.71 (s, 1H), 7.58 (t, 1H,  $J = 7.0$  Hz), 7.47 (app. t, 2H,  $J = 7.5$  Hz), 7.29 (s, 1H), 7.28 (d, 1H,  $J = 1.5$  Hz), 7.203 (s, 1H), 7.08 (s, 1H), 6.55 (s, 1H). ESI  $m/z$ : 497.6 ( $[M-H]^-$ ,  $C_{22}H_{13}BrNO_6S$  requires 498.0).

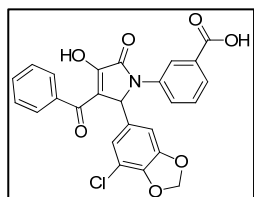

**VPL-055:** 3-aminobenzoic acid (31 mg, 0.227mmol), 7-chlorobenzo[d][1,3]dioxole-5-carbaldehyde (42mg, 0.227mmol), ethyl 2,4-dioxo-4-phenylbutanoate (50mg, 0.227 mmol), and

triethylamine (1.13 mmol) were combined in 2 ml of dioxane and heated at reflux overnight. The crude reaction mixture was concentrated and partitioned between dichloromethane and 1N HCl. The organic layer was dried over  $Na_2SO_4$  and concentrated under reduced pressure and purified by chromatography (0–100% Hexanes/Ethyl Acetate followed by 95% EtOAc, 2.5%  $H_2O$ , 2.5% formic acid) to afford the desired product.

$^1\text{H}$  NMR (500 MHz, acetone- $d_6$ )  $\delta$  8.43 (s, 1H), 7.91 (d,  $J$  = 6.8 Hz, 3H), 7.81 (d,  $J$  = 7.6 Hz, 1H), 7.60 (t,  $J$  = 7.2 Hz, 1H), 7.50 (q,  $J$  = 7.6 Hz, 3H), 7.12 (s, 1H), 6.99 (s, 1H), 6.36 (s, 1H), 5.99 (d,  $J$  = 4.0 Hz, 2H). ESI  $m/z$ : 475.7 ( $[\text{M}-\text{H}]^-$ ,  $\text{C}_{25}\text{H}_{16}\text{ClNO}_7$  requires 476.0).

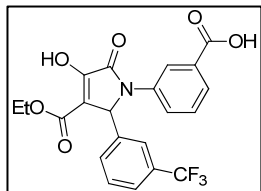

**VPL-056:** 3-(trifluoromethyl)benzaldehyde (348 mg, 2.0 mmol), 3-aminobenzoic acid (274 mg, 2.0 mmol), diethyl oxalacetate (188 mg, 1.0 mmol), and triethylamine (5.0 mmol) were dissolved in 5ml

of dioxane and heated to reflux overnight. The crude reaction mixture was concentrated and partitioned between dichloromethane and 1N HCl. The organic layer was dried over  $\text{Na}_2\text{SO}_4$  and concentrated under reduced pressure and purified by chromatography (0–100% Hexanes/Ethyl Acetate followed by 95% EtOAc, 2.5%  $\text{H}_2\text{O}$ , 2.5% formic acid) to afford the desired product.

$^1\text{H}$  NMR (500 MHz, acetone- $d_6$ )  $\delta$  8.35 (s, 1H), 7.96 – 7.85 (m, 2H), 7.77 (d,  $J$  = 7.7 Hz, 1H), 7.68 (d,  $J$  = 7.3 Hz, 1H), 7.57 (d,  $J$  = 7.3 Hz, 1H), 7.52 (t,  $J$  = 7.6 Hz, 1H), 7.45 (t,  $J$  = 7.9 Hz, 1H), 6.30 (s, 1H), 4.15 (dd,  $J$  = 9.8, 7.4 Hz, 2H), 1.16 (t,  $J$  = 7.1 Hz, 3H). ESI  $m/z$ : 433.8 ( $[\text{M}-\text{H}]^-$ ,  $\text{C}_{21}\text{H}_{16}\text{F}_3\text{NO}_6$  requires 434.1).

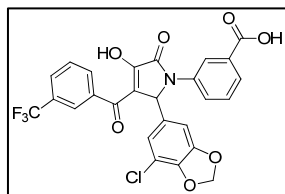

**VPL-057:** 3-aminobenzoic acid (48 mg, 0.35 mmol), 7-chlorobenzo[d][1,3]dioxole-5-carbaldehyde (64 mg, 0.35 mmol),

ethyl 2,4-dioxo-4-(3-(trifluoromethyl)phenyl)butanoate (50 mg, 0.17 mmol), and triethylamine (0.87 mmol) were combined in 3ml of dioxane and heated at reflux overnight. The crude reaction mixture was concentrated and partitioned between dichloromethane and 1N HCl. The organic layer was dried over Na<sub>2</sub>SO<sub>4</sub> and concentrated under reduced pressure and purified by chromatography (0–100% Hexanes/Ethyl Acetate followed by 95% EtOAc, 2.5% H<sub>2</sub>O, 2.5% formic acid) to afford the desired product.

<sup>1</sup>H NMR (500 MHz, acetone-*d*<sub>6</sub>) δ 8.43 (d, *J* = 0.5 Hz, 1H), 8.19 (s, 2H), 7.92 (d, *J* = 7.7 Hz, 2H), 7.81 (d, *J* = 7.6 Hz, 1H), 7.77 – 7.66 (m, 1H), 7.50 (t, *J* = 7.6 Hz, 1H), 7.16 (s, 1H), 7.03 (s, 1H), 6.34 (s, 1H), 5.99 (s, 2H). ESI *m/z*: 543.7 ([M–H]<sup>–</sup>, C<sub>26</sub>H<sub>15</sub>F<sub>3</sub>NO<sub>7</sub> requires 544.0).

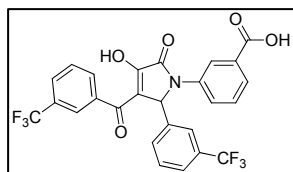

**VPL-058:** 3-aminobenzoic acid (47 mg, 0.35 mmol), 3-(trifluoromethyl)benzaldehyde (60 mg, 0.35 mmol), ethyl 2,4-dioxo-4-(3-(trifluoromethyl)phenyl)butanoate (50 mg, 0.17 mmol),

and triethylamine (0.87 mmol) were combined in 2 ml of dioxane and heated at reflux overnight. The crude reaction mixture was concentrated and partitioned between dichloromethane and 1N HCl. A precipitant was formed during the work-up, which was filtered and dried to afford the desired product. (59 mg white solid).

<sup>1</sup>H NMR (500 MHz, acetone-*d*<sub>6</sub>) δ 8.41 (s, 1H), 8.15 (d, *J* = 6.6 Hz, 2H), 7.98 (s, 1H), 7.93 (dd, *J* = 6.4, 4.2 Hz, 2H), 7.87 (d, *J* = 7.0 Hz, 1H), 7.79 (d, *J* = 7.7 Hz, 1H), 7.74 (t,

$J = 8.0$  Hz, 1H), 7.53 – 7.45 (m, 3H), 6.57 (s, 1H). ESI  $m/z$ : 533.8 ( $[M-H]^-$ ,  $C_{26}H_{15}F_6NO_5$  requires 534.09).

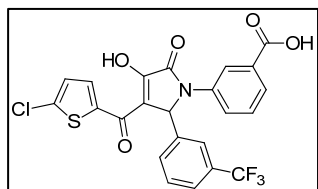

**VPL-059:** 3-aminobenzoic acid (53 mg, 0.38 mmol), 3-(trifluoromethyl)benzaldehyde (67 mg, 0.38 mmol), ethyl 2,4-dioxo-4-(3-(trifluoromethyl)phenyl)butanoate (50 mg, 0.19 mmol), and triethylamine (0.96 mmol) were combined in 2 ml of

dioxane and heated at reflux overnight. The crude reaction mixture was concentrated and partitioned between dichloromethane and 1N HCl. The organic layer was dried over  $Na_2SO_4$  and concentrated under reduced pressure and purified by chromatography (0–100% Hexanes/Ethyl Acetate followed by 95% EtOAc, 2.5%  $H_2O$ , 2.5% formic acid) to afford the desired product.

$^1H$  NMR (500 MHz, acetone- $d_6$ )  $\delta$  8.39 (s, 1H), 8.16 (d,  $J = 4.2$  Hz, 1H), 7.92 (dd,  $J = 8.1, 1.2$  Hz, 1H), 7.89 (s, 1H), 7.78 (d,  $J = 7.7$  Hz, 2H), 7.51 (d,  $J = 7.8$  Hz, 1H), 7.47 (t,  $J = 8.0$  Hz, 2H), 7.18 (d,  $J = 4.2$  Hz, 1H), 6.51 (s, 1H). ESI  $m/z$ : 506.7 ( $[M-H]^-$ ,  $C_{23}H_{13}ClF_3NO_5S$  requires 506.0).

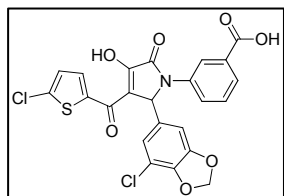

**VPL-060:** 3-aminobenzoic acid (53 mg, 0.38 mmol), 7-chlorobenzo[d][1,3]dioxole-5-carbaldehyde (71 mg, 0.38 mmol), ethyl 4-(5-chlorothiophen-2-yl)-2,4-dioxobutanoate (50 mg, 0.19

mmol), and triethylamine (97 mg, 0.96 mmol) were combined in 2 ml of dioxane and heated at reflux overnight. The crude reaction mixture was concentrated and partitioned



between dichloromethane and 1N HCl. A white precipitate formed in the DCM layer which was filtered and rinsed with cold DCM to afford the desired product (30.1 mg).

$^1\text{H}$  NMR (500 MHz, acetone- $d_6$ )  $\delta$  8.40 (d,  $J$  = 1.5 Hz, 1H), 8.18 (d,  $J$  = 4.1 Hz, 1H), 7.90 (dd,  $J$  = 8.1, 2.0 Hz, 1H), 7.81 (d,  $J$  = 7.7 Hz, 1H), 7.50 (t,  $J$  = 7.9 Hz, 1H), 7.19 (d,  $J$  = 4.1 Hz, 1H), 7.10 (d,  $J$  = 1.4 Hz, 1H), 6.94 (d,  $J$  = 1.5 Hz, 1H), 6.30 (s, 1H), 6.00 (d,  $J$  = 1.1 Hz, 2H). ESI  $m/z$ : 515.6 ( $[\text{M}-\text{H}]^-$ ,  $\text{C}_{23}\text{H}_{13}\text{Cl}_2\text{NO}_7\text{S}$  requires 515.0).

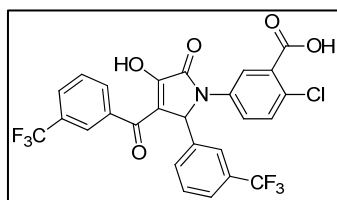

**VPL-061:** 3-(trifluoromethyl)benzaldehyde (47 mg, 0.27 mmol), 5-amino-2-chloro-benzoic acid (46 mg, 0.27 mmol), and ethyl 2,4-dioxo-4-(3-(trifluoromethyl)phenyl)butanoate (39 mg,

0.135 mmol), and triethylamine (68 mg, 0.67 mmol) were combined in dioxane and heated at reflux overnight. The crude reaction mixture was concentrated and partitioned between dichloromethane and 1N HCl. A white precipitate formed in the DCM layer which was filtered and rinsed with cold DCM to afford the desired product (32 mg).

$^1\text{H}$  NMR (500 MHz, acetone- $d_6$ )  $\delta$  8.30 (d,  $J$  = 2.7 Hz, 1H), 8.13 (s, 2H), 8.00 (s, 1H), 7.93 (d,  $J$  = 7.8 Hz, 1H), 7.90 – 7.84 (m, 2H), 7.73 (t,  $J$  = 8.0 Hz, 1H), 7.53 (t,  $J$  = 6.7 Hz, 1H), 7.49 (d,  $J$  = 8.7 Hz, 2H), 6.55 (s, 1H). ESI  $m/z$ : 567.7 ( $[\text{M}-\text{H}]^-$ ,  $\text{C}_{26}\text{H}_{14}\text{ClF}_6\text{NO}_5$  requires 568.0)

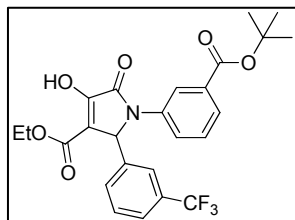

**VPL-062:** Diethyl oxalacetate (75 mg, 0.399 mmol), tert-butyl-3-aminobenzoate (154 mg, 0.8 mmol), 3-trifluoromethylbenzaldehyde (139 mg, 0.8 mmol), and triethylamine (202 mg, 1.99 mmol) were combined in 3ml dioxane

and heated at reflux overnight. The crude reaction mixture was concentrated and partitioned between dichloromethane and 1N HCl. The organic layer was concentrated and dried over Na<sub>2</sub>SO<sub>4</sub> and concentrated under reduced pressure and purified by chromatography (0–100% Hexanes/Ethyl Acetate followed by 95% EtOAc, 2.5% H<sub>2</sub>O, 2.5% formic acid) to afford the desired product (27 mg tan solid).

<sup>1</sup>H NMR (500 MHz, acetone-*d*<sub>6</sub>) δ 8.21 (s, 1H), 7.93 (d, *J* = 7.4 Hz, 1H), 7.70 – 7.63 (m, 2H), 7.57 (d, *J* = 6.1 Hz, 1H), 7.52 (d, *J* = 8.3 Hz, 1H), 7.41 (t, *J* = 7.9 Hz, 1H), 6.25 (s, 1H), 4.14 (dd, *J* = 14.6, 7.0 Hz, 2H), 1.56 (s, 9H), 1.14 (t, *J* = 6.3 Hz, 3H). ESI *m/z*: 489.8 ([M-H]<sup>-</sup>, C<sub>25</sub>H<sub>24</sub>F<sub>3</sub>NO<sub>6</sub> requires 490.0).

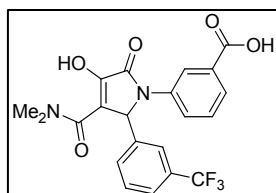

**VPL-063:** 3-aminobenzoic acid (73 mg, 0.534 mmol), 3-(trifluoromethyl)benzaldehyde (93 mg, 0.534 mmol), ethyl 4-(dimethylamino)-2,4-dioxobutanoate (50 mg, 0.267 mmol), and

triethylamine (1.33 mmol) were combined in 2 ml of dioxane and heated at reflux overnight. The crude reaction mixture was concentrated and partitioned between dichloromethane and 1N HCl.

<sup>1</sup>H NMR (500 MHz, acetone-*d*<sub>6</sub>) δ 8.41 (s, 1H), 7.88 (d, *J* = 7.5, 1H), 7.79 (s, 1H), 7.75 (d, *J* = 7.3, 1H), 7.70 (d, *J* = 7.0, 1H), 7.57 (d, *J* = 7.0, 1H), 7.51 (t, *J* = 7.3, 1H), 7.44 (t, *J* = 7.7, 1H), 6.40 (s, 1H), 2.91 (s, 6H). ESI *m/z*: 432.8 ([M-H]<sup>-</sup>, C<sub>21</sub>H<sub>17</sub>F<sub>3</sub>N<sub>2</sub>O<sub>5</sub> requires 490.0).

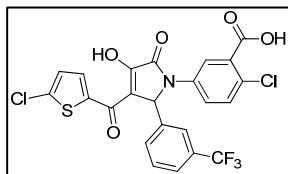

**VPL-064:** Imine 13 (126mg, 0.38mmol), ethyl 4-(5-chlorothiophen-2-yl)-2,4-dioxobutanoate (50 mg, 0.19 mmol), and triethylamine (0.96 mmol) were combined in dioxane and heated to reflux

overnight. The crude reaction mixture was concentrated and partitioned between dichloromethane and 1N HCl. The organic layer was dried over Na<sub>2</sub>SO<sub>4</sub> and concentrated under reduced pressure and purified by chromatography (0–100% Hexanes/Ethyl Acetate followed by 95% EtOAc, 2.5% H<sub>2</sub>O, 2.5% formic acid) followed precipitation from ethyl acetate:hexanes to afford the desired product.

<sup>1</sup>H NMR (500 MHz, acetone-*d*<sub>6</sub>) δ 8.29 (d, *J* = 2.6, 1H), 8.15 (d, *J* = 4.1, 1H), 7.92 (s, 1H), 7.87 (dd, *J* = 2.6, 8.8, 1H), 7.79 (d, *J* = 7.6, 1H), 7.54 (d, *J* = 7.7, 1H), 7.49 (t, *J* = 7.3, 2H), 7.18 (d, *J* = 4.1, 1H), 6.50 (s, 1H). ESI *m/z*: 539.7 ([M-H]<sup>-</sup>, C<sub>23</sub>H<sub>12</sub>Cl<sub>2</sub>F<sub>3</sub>NO<sub>5</sub>S requires 539.98).

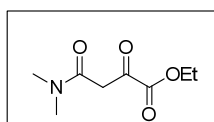

#### **Ethyl 4-(dimethylamino)-2,4-dioxobutanoate(2)**

To a dry round bottom flask was added dimethylacetamide (11.48mmol) and 60ml of dry THF. The mixture was cooled to -78C in a dry ice/acetone bath. Lithium diisopropylamide (12.62mmol) was added drop wise, so that the temperature of the flask did not exceed -70C. The mixture was stirred for 10 minutes before the addition of diethyl oxalate (11.48mmol) in 5ml of THF (drop wise). The mixture was warmed to room temperature and stirred for 12 hours, re-cooled to -78C

and a solution of acetic acid in THF was added. After warming to room temperature the reaction was partitioned between water and diethyl ether. The aqueous layer was extracted 3X. The combined organic extracts were dried  $\text{Na}_2\text{SO}_4$ , concentrated and purified by chromatography (0–100% Hexanes/Ethyl Acetate) to afford the desired product.

$^1\text{H}$  NMR (500 MHz,  $\text{CDCl}_3$ )  $\delta$  6.25 (s, 1H), 4.34 (q,  $J = 7.0$  Hz, 2H), 3.06 (d,  $J = 27.8$  Hz, 7H), 1.36 (t,  $J = 7.1$  Hz, 4H).

## **References**

1. Weisse K, H. (1911) Action of Sulfur Monochloride and of Sulfuryl Chloride on Piperonaldehyde. *Chem. Berichte*, 43:2605-2606.
2. Goldup SM, Pilkington CJ, White AJ, Burton A, & Barrett AG (2006) A simple, short, and flexible synthesis of viridifungin derivatives. (Translated from eng) *J Org Chem* 71(16):6185-6191 (in eng).

## **Supplementary Tables**

**Supplementary Table 1. Effect of functional groups of the pyrrolidinone scaffold on the potency of small molecule binding.** Dissociation constants ( $K_D$ ) are measured by NMR.

**Supplementary Table 2. Small molecules arranged by functional groups.** Same compounds as Supplementary Table 1 arranged according to the different functional groups at ring B, C, and D.

## **SI Figures**

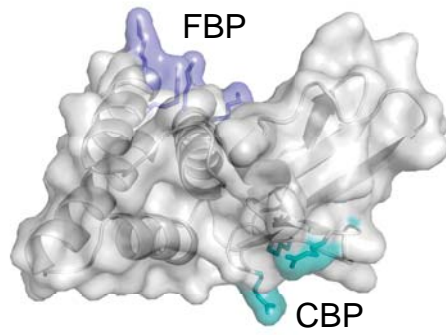

**Supplementary Fig. 1. Filoviral VP35 IIDs contain two highly conserved basic patches termed Central Basic Patch (CBP) and First Basic Patch (FBP). Surface representation of VP35 IID with CBP and FBP labeled.**

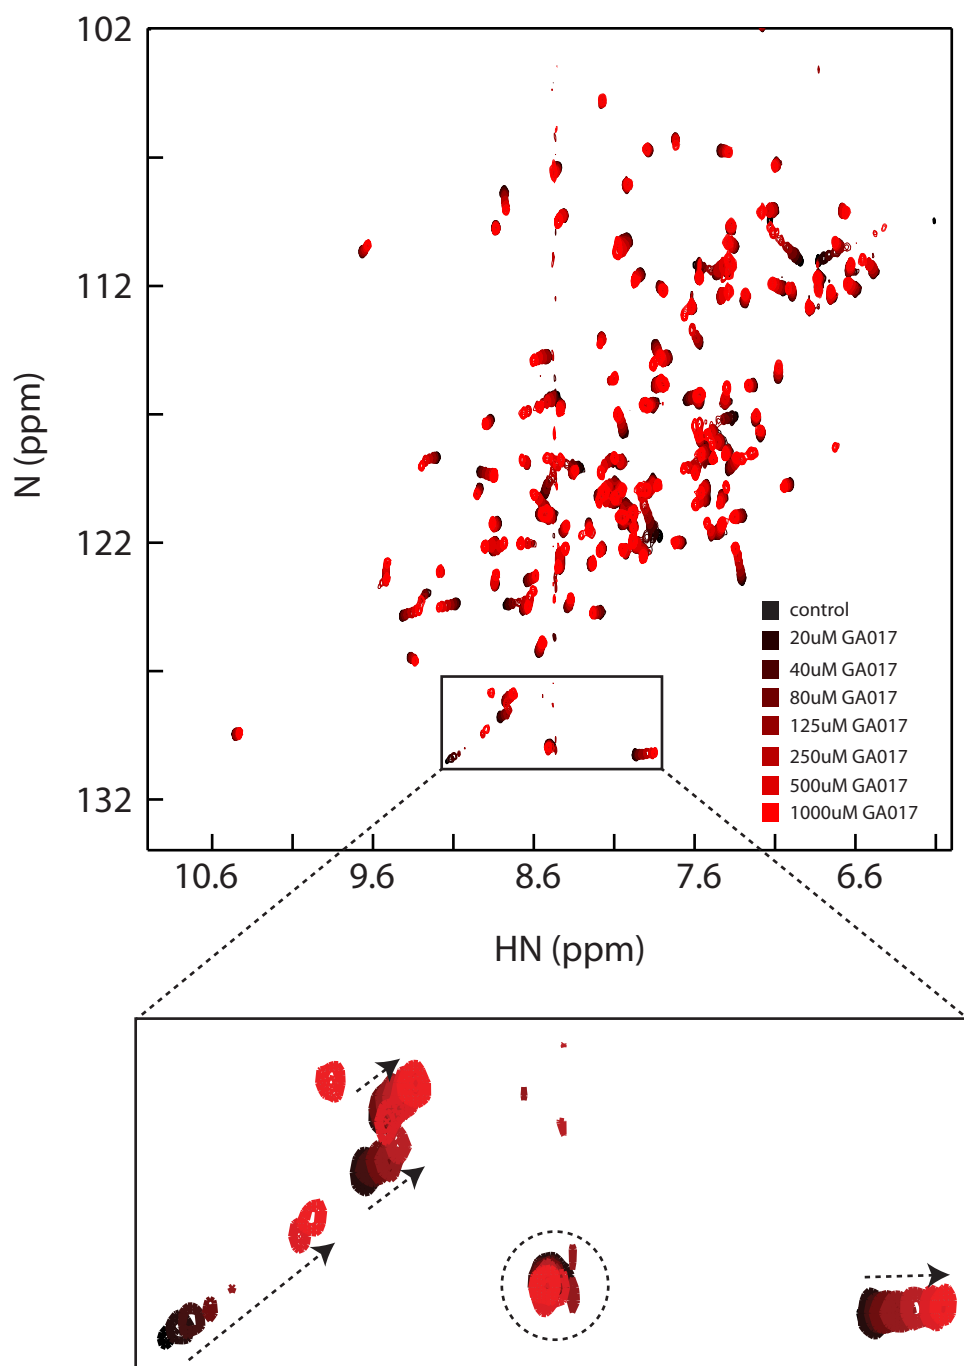

**Supplementary Fig. 2. GA017-VP35 eIID interactions are in the fast exchange regime.** 1H-15N HSQC spectrum of 15N-enriched eIID in the absence (black) or presence of increasing concentrations (dark red to light red) of GA017.

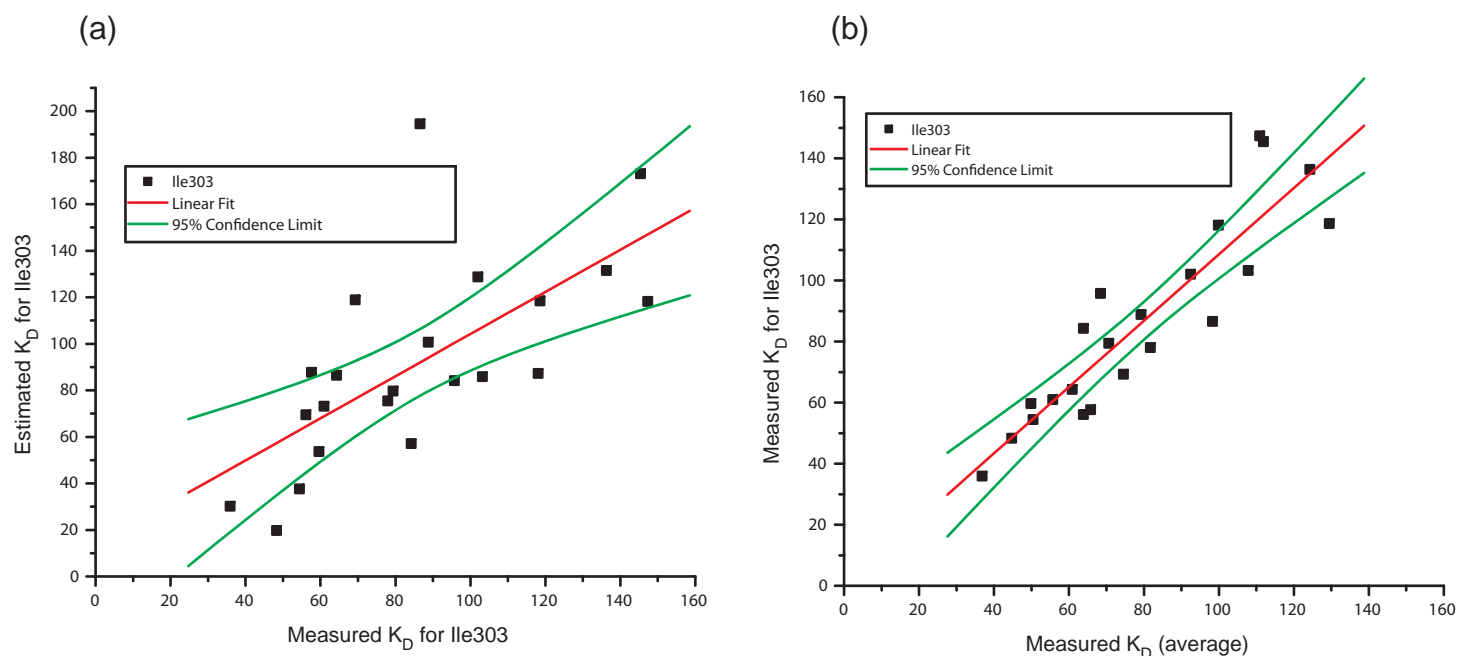

**Supplementary Fig. 3. Chemical shift of I303 residue serves as a reliable reporter for estimating binding affinity from HSQC data.** Correlation coefficients for:(a) estimated binding affinity from single point Ile303 chemical shift changes vs. measured binding affinity from Ile303 titration data ( $r^2 = 0.91 \pm 0.22$ ), and (b) measured binding affinity from Ile303 titration data vs. measured binding affinity from averaged titration data for several residues in the binding pocket ( $r^2 = 1.09 \pm 0.11$ ).

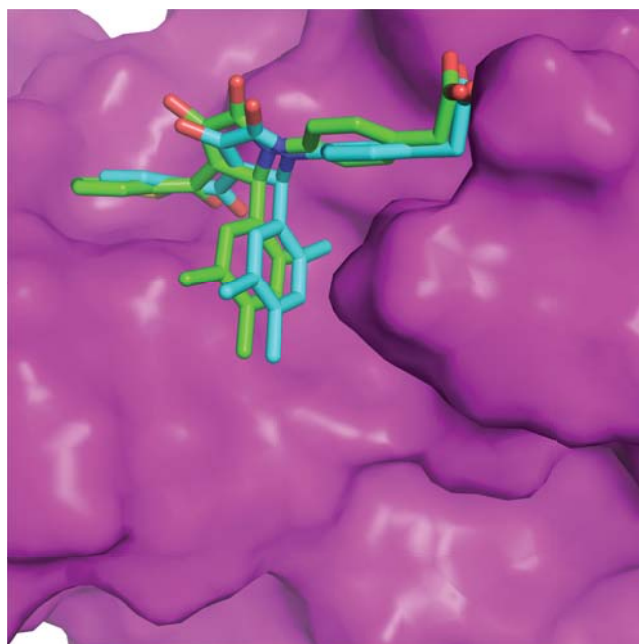

**Supplementary Fig. 4. Docked structures closely resemble experimentally derived ligand bound complexes.** Docked (green) and experimentally derived structures (blue) of GA017.



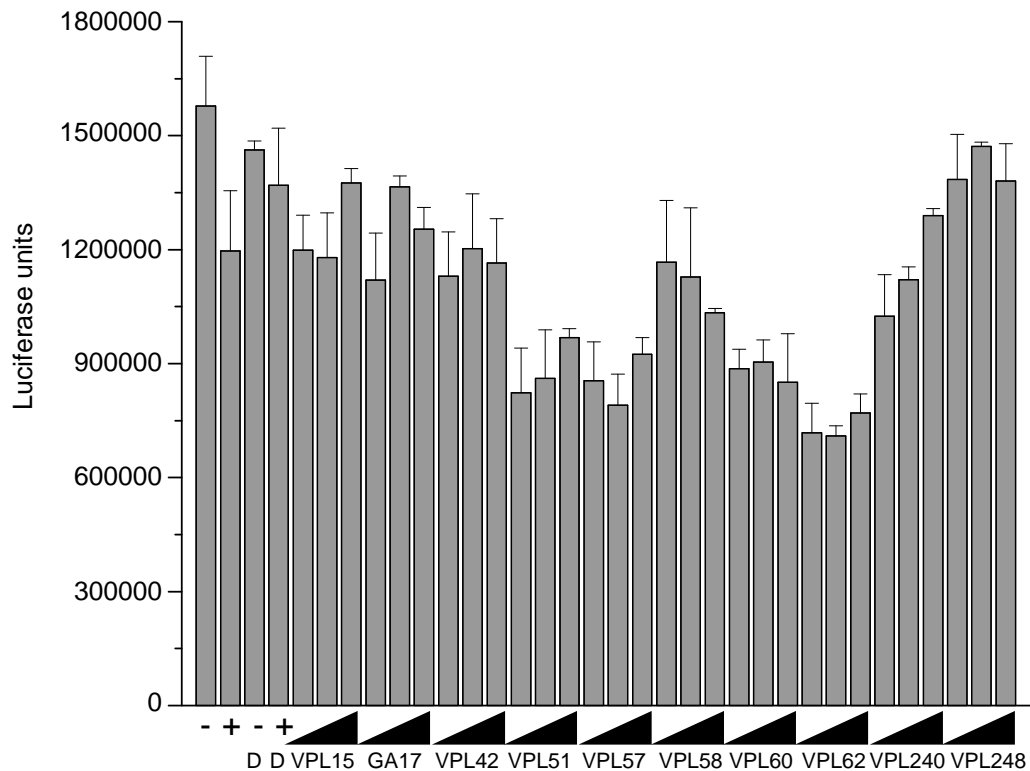

**Supplementary Fig. 5. Firefly luciferase activity does not show a dose dependence with increasing compound concentrations.** Experimentally measured Firefly luciferase levels for control and experimental conditions. Plus/minus indicate experiments with and without VP35. DMSO (D) lanes are with the addition of 0.5% DMSO, which was the highest concentration used in these assays as a co-solvent. Error bars represent standard errors in triplicate experiments. For each compound the Firefly luciferase activity between different doses is not statistically significant.

Supplementary Table 1: Substructures by potency

| Scaffold |             |                                   | 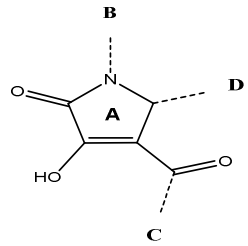  |                                                                                       |                                                                                       |
|----------|-------------|-----------------------------------|--------------------------------------------------------------------------------------|---------------------------------------------------------------------------------------|---------------------------------------------------------------------------------------|
|          | smx         | $K_D$ ( $\mu\text{M}$ , estimate) | $K_D$ ( $\mu\text{M}$ , NMR)                                                         | N1 (B)                                                                                | 4-keto (C)                                                                            |
| VPL-64   | $30 \pm 7$  | $58.90 \pm 21.1$                  |    |    |    |
| VPL-60   | $33 \pm 7$  | $50.4 \pm 4.7$                    |    |    |    |
| VPL-36   | $36 \pm 13$ | $49.9 \pm 9.8$                    |    |    |    |
| VPL-61   | $36 \pm 10$ | $38.7 \pm 16.0$                   |    |    |    |
| VPL-34   | $39 \pm 16$ | $63.9 \pm 17.7$                   |   |   |   |
| VPL-42   | $46 \pm 19$ | $36.8 \pm 8.1$                    |  |  |  |
| VPL-59   | $47 \pm 38$ | $55.7 \pm 4.9$                    |  |  |  |
| VPL-51   | $49 \pm 35$ | $44.8 \pm 3.2$                    |  |  |  |

Supplementary Table 1: Substructures by potency

| Scaffold |             |                             | 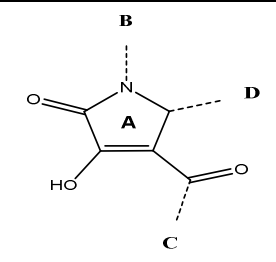   |                                                                                       |                                                                                       |
|----------|-------------|-----------------------------|--------------------------------------------------------------------------------------|---------------------------------------------------------------------------------------|---------------------------------------------------------------------------------------|
|          | smx         | $K_D$ ( $\mu M$ , estimate) | $K_D$ ( $\mu M$ , NMR)                                                               | N1 (B)                                                                                | 4-keto (C)                                                                            |
| VPL-57   | $52 \pm 10$ | $73.0 \pm 31.0$             |    |    |    |
| VPL-58   | $52 \pm 45$ | $47.0 \pm 4.0$              |    |    |    |
| VPL-29   | $60 \pm 16$ | $70.6 \pm 7.9$              |    |    |    |
| VPL-46   | $63 \pm 18$ | $68.5 \pm 33.0$             |    |    |    |
| VPL-39   | $70 \pm 14$ | $65.8 \pm 10.2$             |   |   |   |
| VPL-43   | $77 \pm 15$ | $81.7 \pm 6.1$              |  |  |  |
| VPL-49   | $79 \pm 17$ | $79.2 \pm 8.5$              |  |  |  |
| VPL-48   | $79 \pm 3$  | $108.0 \pm 7.0$             |  |  |  |

**Supplementary Table 1: Substructures by potency**

| Scaffold    |              |                                   | 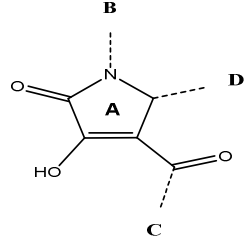  |                                                                                       |                                                                                       |
|-------------|--------------|-----------------------------------|--------------------------------------------------------------------------------------|---------------------------------------------------------------------------------------|---------------------------------------------------------------------------------------|
|             | smx          | $K_D$ ( $\mu\text{M}$ , estimate) | $K_D$ ( $\mu\text{M}$ , NMR)                                                         | N1 (B)                                                                                | 4-keto (C)                                                                            |
| VPL-52      | $80 \pm 3$   | $60.9 \pm 3.0$                    |    |    |    |
| VPL-50      | $80 \pm 26$  | $63.9 \pm 7.4$                    |    |    |    |
| VPL-44      | $89 \pm 14$  | $99.9 \pm 25.9$                   |    |    |    |
| GA312=GA259 | $101 \pm 40$ | $103.8 \pm 41.7$                  |    |    |    |
| VPL-45      | $101 \pm 25$ | $92.5 \pm 8.4$                    |   |   |   |
| VPL-33      | $109 \pm 2$  | $110.9 \pm 41.2$                  |  |  |  |
| VPL-37      | $117 \pm 12$ | $74.6 \pm 14.5$                   |  |  |  |
| VPL-41      | $120 \pm 11$ | $129.5 \pm 35.1$                  |  |  |  |

Supplementary Table 1: Substructures by potency

| Scaffold    |              |                                   | 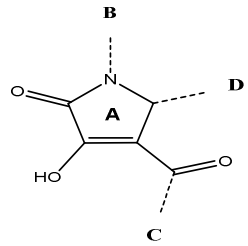  |                                                                                       |                                                                                       |
|-------------|--------------|-----------------------------------|--------------------------------------------------------------------------------------|---------------------------------------------------------------------------------------|---------------------------------------------------------------------------------------|
|             | smx          | $K_D$ ( $\mu\text{M}$ , estimate) | $K_D$ ( $\mu\text{M}$ , NMR)                                                         | N1 (B)                                                                                | 4-keto (C)                                                                            |
| VPL-27      | $124 \pm 36$ | $214.6 \pm 24.9$                  |    |    |    |
| VPL-40      | $126 \pm 32$ | $369.8 \pm 173.3$                 |    |    |    |
| GA228=GA292 | $127 \pm 5$  | $291.9 \pm 17.5$                  |    |    |    |
| GA272       | $128 \pm 34$ | $111.9 \pm 30.7$                  |    |    |    |
| VPL-11      | $134 \pm 11$ | $124.3 \pm 16.2$                  |   |   |   |
| VPL-32      | $135 \pm 44$ | $280.2 \pm 51.2$                  |  |  |  |
| VPL-47      | $138 \pm 40$ |                                   |  |  |  |
| VPL-38      | $149 \pm 45$ | $98.0 \pm 36.0$                   |  |  |  |

Supplementary Table 1: Substructures by potency

| Scaffold |                                   |                              |                                                                                      | 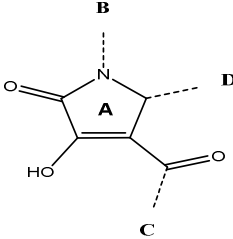   |                                                                                       |
|----------|-----------------------------------|------------------------------|--------------------------------------------------------------------------------------|---------------------------------------------------------------------------------------|---------------------------------------------------------------------------------------|
| smx      | $K_D$ ( $\mu\text{M}$ , estimate) | $K_D$ ( $\mu\text{M}$ , NMR) | N1 (B)                                                                               | 4-keto (C)                                                                            | 5-aryl (D)                                                                            |
| VPL-55   | $152 \pm 40$                      |                              |    |    |    |
| VPL-23   | $161 \pm 86$                      |                              |    |    |    |
| VPL-24   | $161 \pm 82$                      |                              |    |    |    |
| GA307    | $179 \pm 72$                      |                              |    |    |    |
| GA307    | $179 \pm 72$                      |                              |   |   |   |
| GA272-B  | $204 \pm 28$                      | $114.1 \pm 20.6$             |  |  |  |
| GA286    | $238 \pm 48$                      |                              |  |  |  |
| GA286    | $238 \pm 48$                      |                              |  |  |  |

Supplementary Table 1: Substructures by potency

| Scaffold    |              |                                   |                                                                                      |                                                                                       | 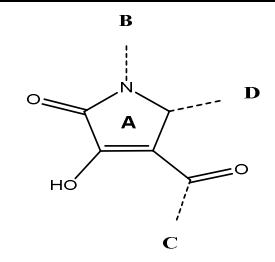    |            |
|-------------|--------------|-----------------------------------|--------------------------------------------------------------------------------------|---------------------------------------------------------------------------------------|---------------------------------------------------------------------------------------|------------|
|             | smx          | $K_D$ ( $\mu\text{M}$ , estimate) | $K_D$ ( $\mu\text{M}$ , NMR)                                                         | N1 (B)                                                                                | 4-keto (C)                                                                            | 5-aryl (D) |
| GA315       | $260 \pm 49$ |                                   |    |    |    |            |
| GA315       | $260 \pm 49$ |                                   |    |    |    |            |
| GA274=GA322 | $264 \pm 63$ |                                   |    |    |    |            |
| GA274       | $264 \pm 63$ |                                   |    |    |    |            |
| VPL-21      | $266 \pm 47$ |                                   |   |   |   |            |
| GA294       | $275 \pm 39$ |                                   |  |  |  |            |
| GA294       | $275 \pm 39$ |                                   |  |  |  |            |
| GA322       | $281 \pm 78$ |                                   |  |  |  |            |

Supplementary Table 1: Substructures by potency

| Scaffold |                                   |                              |                                                                                      | 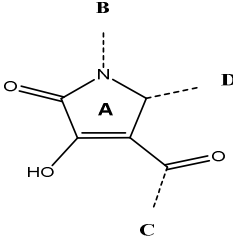   |                                                                                       |
|----------|-----------------------------------|------------------------------|--------------------------------------------------------------------------------------|---------------------------------------------------------------------------------------|---------------------------------------------------------------------------------------|
| smx      | $K_D$ ( $\mu\text{M}$ , estimate) | $K_D$ ( $\mu\text{M}$ , NMR) | N1 (B)                                                                               | 4-keto (C)                                                                            | 5-aryl (D)                                                                            |
| GA017-D  | $296 \pm 111$                     |                              |    |    |    |
| VPL-6    | $307 \pm 51$                      |                              |    |    |    |
| GA314    | $313 \pm 88$                      |                              |    |    |    |
| GA239    | $323 \pm 109$                     |                              |    |    |    |
| GA239    | $323 \pm 109$                     |                              |   |  |   |
| GA256    | $330 \pm 158$                     |                              |  |  |  |
| GA212    | $331 \pm 62$                      |                              |  |  |  |



Supplementary Table 1: Substructures by potency

| Scaffold |                                   |                              | 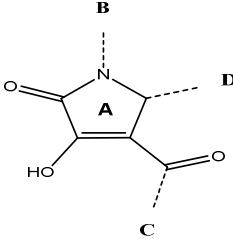  |                                                                                       |                                                                                       |
|----------|-----------------------------------|------------------------------|--------------------------------------------------------------------------------------|---------------------------------------------------------------------------------------|---------------------------------------------------------------------------------------|
| smx      | $K_D$ ( $\mu\text{M}$ , estimate) | $K_D$ ( $\mu\text{M}$ , NMR) | N1 (B)                                                                               | 4-keto (C)                                                                            | 5-aryl (D)                                                                            |
| GA212    | $331 \pm 62$                      |                              |    |    |    |
| VPL-5    | $335 \pm 38$                      |                              |    |    |    |
| GA222    | $346 \pm 136$                     |                              |    |    |    |
| VPL-19   | $346 \pm 168$                     |                              |   |   |    |
| GA229    | $353 \pm 159$                     |                              |  |  |  |
| VPL-8    | $357 \pm 68$                      |                              |  |  |  |
| VPL-3    | $361 \pm 24$                      |                              |  |  |  |

**Supplementary Table 1: Substructures by potency**

| Scaffold    |                                   |                              | 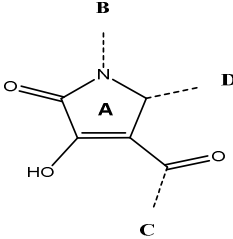  |                                                                                       |                                                                                       |
|-------------|-----------------------------------|------------------------------|--------------------------------------------------------------------------------------|---------------------------------------------------------------------------------------|---------------------------------------------------------------------------------------|
| smx         | $K_D$ ( $\mu\text{M}$ , estimate) | $K_D$ ( $\mu\text{M}$ , NMR) | N1 (B)                                                                               | 4-keto (C)                                                                            | 5-aryl (D)                                                                            |
| GA251       | $369 \pm 134$                     |                              |    |    |    |
| VPL-13      | $372 \pm 87$                      |                              |    |    |    |
| VPL-7       | $378 \pm 72$                      |                              |    |    |    |
| VPL-31      | $384 \pm 76$                      |                              |   |  |   |
| GA234       | $385 \pm 145$                     |                              |  |  |  |
| GA243=GA301 | $386 \pm 83$                      |                              |  |  |  |

Supplementary Table 1: Substructures by potency

| Scaffold |                                   |                              | 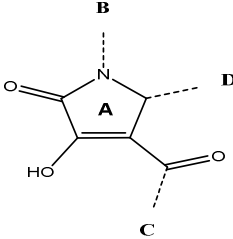  |                                                                                       |                                                                                       |
|----------|-----------------------------------|------------------------------|--------------------------------------------------------------------------------------|---------------------------------------------------------------------------------------|---------------------------------------------------------------------------------------|
| smx      | $K_D$ ( $\mu\text{M}$ , estimate) | $K_D$ ( $\mu\text{M}$ , NMR) | N1 (B)                                                                               | 4-keto (C)                                                                            | 5-aryl (D)                                                                            |
| GA263    | $417 \pm 107$                     |                              |    |    |    |
| VPL-53   | $418 \pm 70$                      |                              |    |    |    |
| GA231    | $447 \pm 100$                     |                              |    |    |    |
| GA218    | $453 \pm 91$                      |                              |   |    |    |
| VPL-63   | $453 \pm 252$                     | $518.1 \pm 310.2$            |  |  |  |
| VPL-28   | $458 \pm 108$                     |                              |  |  |  |
| GA310    | $475 \pm 60$                      |                              |  |  |  |

Supplementary Table 1: Substructures by potency

| Scaffold | 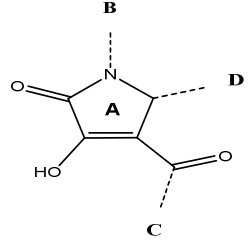 |                                   |                                                                                      |                                                                                       |                                                                                       |
|----------|-------------------------------------------------------------------------------------|-----------------------------------|--------------------------------------------------------------------------------------|---------------------------------------------------------------------------------------|---------------------------------------------------------------------------------------|
|          | smx                                                                                 | $K_D$ ( $\mu\text{M}$ , estimate) | $K_D$ ( $\mu\text{M}$ , NMR)                                                         | N1 (B)                                                                                | 4-keto (C)                                                                            |
| VPL-22   | $478 \pm 187$                                                                       |                                   |    |    |    |
| VPL-35   | $483 \pm 134$                                                                       |                                   |    |    |    |
| VPL-20   | $485 \pm 172$                                                                       |                                   |    |    |    |
| GA293    | $502 \pm 52$                                                                        |                                   |    |    |    |
| GA262    | $504 \pm 204$                                                                       |                                   |   |   |   |
| VPL-14   | $512 \pm 94$                                                                        |                                   |  |  |  |
| GA313    | $516 \pm 92$                                                                        |                                   |  |  |  |

Supplementary Table 1: Substructures by potency

| Scaffold    |                                   |                              | 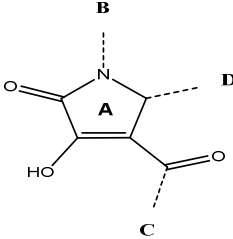  |                                                                                       |                                                                                       |
|-------------|-----------------------------------|------------------------------|--------------------------------------------------------------------------------------|---------------------------------------------------------------------------------------|---------------------------------------------------------------------------------------|
| smx         | $K_D$ ( $\mu\text{M}$ , estimate) | $K_D$ ( $\mu\text{M}$ , NMR) | N1 (B)                                                                               | 4-keto (C)                                                                            | 5-aryl (D)                                                                            |
| GA249       | $517 \pm 127$                     |                              |    |    |    |
| VPL-25      | $533 \pm 60$                      |                              |    |    |    |
| GA235=GA297 | $537 \pm 62$                      |                              |    |    |    |
| GA287       | $547 \pm 48$                      |                              |   |    |    |
| GA299       | $552 \pm 149$                     |                              |  |  |  |
| GA017       | $555 \pm 112$                     | $270.7 \pm 80.0$             |  |  |  |
| GA250=GA306 | $565 \pm 237$                     |                              |  |  |  |

Supplementary Table 1: Substructures by potency

| Scaffold |                                   |                              | 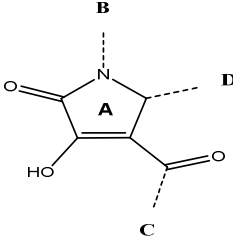  |                                                                                       |                                                                                       |
|----------|-----------------------------------|------------------------------|--------------------------------------------------------------------------------------|---------------------------------------------------------------------------------------|---------------------------------------------------------------------------------------|
| smx      | $K_D$ ( $\mu\text{M}$ , estimate) | $K_D$ ( $\mu\text{M}$ , NMR) | N1 (B)                                                                               | 4-keto (C)                                                                            | 5-aryl (D)                                                                            |
| GA324    | $585 \pm 34$                      |                              |    |    |    |
| GA241    | $609 \pm 101$                     |                              |    |    |    |
| GA285    | $626 \pm 109$                     |                              |    |    |    |
| GA304    | $629 \pm 98$                      |                              |    |    |    |
| VPL-4    | $655 \pm 183$                     |                              |  |  |  |
| GA230    | $659 \pm 231$                     |                              |  |  |  |
| GA311    | $690 \pm 104$                     |                              |  |  |  |

Supplementary Table 1: Substructures by potency

| Scaffold    |                                   |                              | 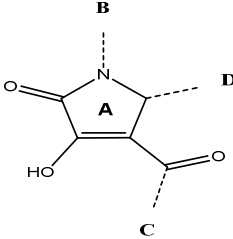  |                                                                                       |                                                                                       |
|-------------|-----------------------------------|------------------------------|--------------------------------------------------------------------------------------|---------------------------------------------------------------------------------------|---------------------------------------------------------------------------------------|
| smx         | $K_D$ ( $\mu\text{M}$ , estimate) | $K_D$ ( $\mu\text{M}$ , NMR) | N1 (B)                                                                               | 4-keto (C)                                                                            | 5-aryl (D)                                                                            |
| GA254=GA318 | $475 \pm 60$                      |                              |    |    |    |
| GA320       | $726 \pm 151$                     |                              |    |    |    |
| GA210       | $752 \pm 175$                     |                              |    |    |    |
| GA022       | $753 \pm 74$                      |                              |   |   |   |
| GA258       | $760 \pm 166$                     |                              |  |  |  |
| VPL-30      | $764 \pm 383$                     |                              |  |  |  |

NH2 on ring

Supplementary Table 1: Substructures by potency

| Scaffold    |                                   |                              | 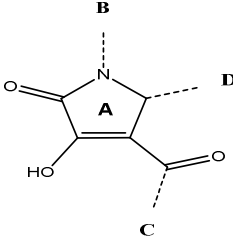  |                                                                                       |                                                                                       |
|-------------|-----------------------------------|------------------------------|--------------------------------------------------------------------------------------|---------------------------------------------------------------------------------------|---------------------------------------------------------------------------------------|
| smx         | $K_D$ ( $\mu\text{M}$ , estimate) | $K_D$ ( $\mu\text{M}$ , NMR) | N1 (B)                                                                               | 4-keto (C)                                                                            | 5-aryl (D)                                                                            |
| GA213       | $773 \pm 142$                     |                              |    |    |    |
| GA217=GA288 | $420 \pm 70$                      |                              |    |    |    |
| VPL-26      | $834 \pm 324$                     |                              |    |    |    |
| GA271       | $836 \pm 279$                     |                              |   |   |   |
| GA224       | $837 \pm 521$                     |                              |  |  |  |
| GA300       | $840 \pm 155$                     |                              |  |  |  |



Supplementary Table 1: Substructures by potency

| Scaffold    |                                   |                              |                                                                                      | 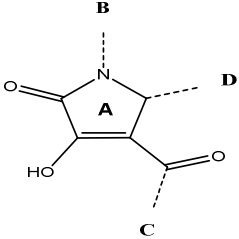   |                                                                                       |
|-------------|-----------------------------------|------------------------------|--------------------------------------------------------------------------------------|---------------------------------------------------------------------------------------|---------------------------------------------------------------------------------------|
| smx         | $K_D$ ( $\mu\text{M}$ , estimate) | $K_D$ ( $\mu\text{M}$ , NMR) | N1 (B)                                                                               | 4-keto (C)                                                                            | 5-aryl (D)                                                                            |
| GA226       | $851 \pm 150$                     |                              |    |    |    |
| GA269       | $876 \pm 266$                     |                              |    |    |    |
| GA267       | $888 \pm 122$                     |                              |    |    |    |
| GA237       | $889 \pm 218$                     |                              |   |   |   |
| GA321       | $924 \pm 233$                     |                              |  |  |  |
| GA223=GA290 | $927 \pm 112$                     |                              |  |  |  |

Supplementary Table 1: Substructures by potency

| Scaffold |                |                                   | 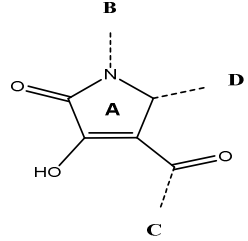  |                                                                                       |                                                                                       |
|----------|----------------|-----------------------------------|--------------------------------------------------------------------------------------|---------------------------------------------------------------------------------------|---------------------------------------------------------------------------------------|
|          | smx            | $K_D$ ( $\mu\text{M}$ , estimate) | $K_D$ ( $\mu\text{M}$ , NMR)                                                         | N1 (B)                                                                                | 4-keto (C)                                                                            |
| GA308    | $936 \pm 30$   |                                   |    |    |    |
| GA242    | $983 \pm 167$  |                                   |    |    |    |
| GA260    | $988 \pm 260$  |                                   |    |    |    |
| GA246    | $1049 \pm 328$ |                                   |    |    |    |
| GA232    | $1069 \pm 193$ |                                   |  |  |  |
| GA238    | $1120 \pm 374$ |                                   |  |  |  |
| GA221    | $1137 \pm 268$ |                                   |  |  |  |

Supplementary Table 1: Substructures by potency

| Scaffold    |                 |                                   | 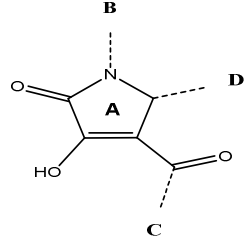  |                                                                                       |                                                                                       |            |
|-------------|-----------------|-----------------------------------|--------------------------------------------------------------------------------------|---------------------------------------------------------------------------------------|---------------------------------------------------------------------------------------|------------|
|             | smx             | $K_D$ ( $\mu\text{M}$ , estimate) | $K_D$ ( $\mu\text{M}$ , NMR)                                                         | N1 (B)                                                                                | 4-keto (C)                                                                            | 5-aryl (D) |
| GA019       | $1177 \pm 54$   |                                   |    |    |    |            |
| GA255       | $1210 \pm 278$  |                                   |    |    |    |            |
| GA017-E     | $1211 \pm 1356$ |                                   |    |    |    |            |
| GA023       | $1215 \pm 459$  |                                   |    |                                                                                       |                                                                                       |            |
| GA295       | $1222 \pm 144$  |                                   |  |  |  |            |
| VPL-56      | $1232 \pm 115$  |                                   |  |  |  |            |
| GA264=GA316 | $1256 \pm 335$  |                                   |  |  |  |            |

Supplementary Table 1: Substructures by potency

| Scaffold    |                                   |                              | 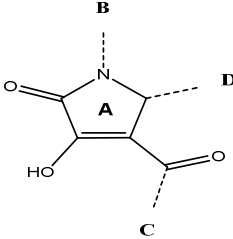  |                                                                                       |                                                                                       |
|-------------|-----------------------------------|------------------------------|--------------------------------------------------------------------------------------|---------------------------------------------------------------------------------------|---------------------------------------------------------------------------------------|
| smx         | $K_D$ ( $\mu\text{M}$ , estimate) | $K_D$ ( $\mu\text{M}$ , NMR) | N1 (B)                                                                               | 4-keto (C)                                                                            | 5-aryl (D)                                                                            |
| GA021       | $1283 \pm 138$                    |                              |    |    |    |
| GA244=GA302 | $1309 \pm 406$                    |                              |    |    |    |
| GA298       | $1324 \pm 402$                    |                              |    |    |    |
| VPL-17      | $1385 \pm 983$                    |                              |   |   |   |
| GA227       | $1423 \pm 268$                    |                              |  |  |  |
| VPL-16      | $1436 \pm 717$                    |                              |  |  |  |
| GA252       | $1472 \pm 332$                    |                              |  |  |  |

**Supplementary Table 1: Substructures by potency**

| Scaffold |                                   |                              | 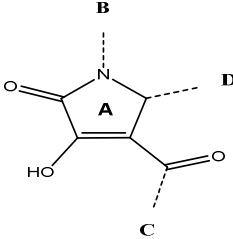  |                                                                                       |                                                                                       |
|----------|-----------------------------------|------------------------------|--------------------------------------------------------------------------------------|---------------------------------------------------------------------------------------|---------------------------------------------------------------------------------------|
| smx      | $K_D$ ( $\mu\text{M}$ , estimate) | $K_D$ ( $\mu\text{M}$ , NMR) | N1 (B)                                                                               | 4-keto (C)                                                                            | 5-aryl (D)                                                                            |
| VPL-18   | $1537 \pm 514$                    |                              |    |    |    |
| VPL-12   | $1588 \pm 620$                    |                              |    |    |    |
| GA219    | $1618 \pm 1034$                   |                              |    |    |    |
| VPL-10   | $1631 \pm 1125$                   |                              |    |    |    |
| GA225    | $1860 \pm 876$                    |                              |  |  |  |
| GA216    | $1890 \pm 1834$                   |                              |  |  |  |
| VPL-9    | $2005 \pm 671$                    |                              |  |  |  |

Supplementary Table 1: Substructures by potency

| Scaffold |                                   |                              | 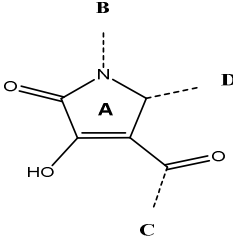  |                                                                                       |                                                                                       |
|----------|-----------------------------------|------------------------------|--------------------------------------------------------------------------------------|---------------------------------------------------------------------------------------|---------------------------------------------------------------------------------------|
| smx      | $K_D$ ( $\mu\text{M}$ , estimate) | $K_D$ ( $\mu\text{M}$ , NMR) | N1 (B)                                                                               | 4-keto (C)                                                                            | 5-aryl (D)                                                                            |
| GA017-F2 | 2023 $\pm$ 2434                   |                              |    |    |    |
| GA303    | 2152 $\pm$ 201                    |                              |    |    |    |
| GA214    | 2348 $\pm$ 1423                   |                              |    |    |    |
| VPL-1    | 2354 $\pm$ 2418                   |                              |   |   |   |
| GA266    | 2474 $\pm$ 1011                   |                              |  |  |  |
| GA291    | 2508 $\pm$ 2240                   |                              |  |  |  |

**Supplementary Table 1: Substructures by potency**

| Scaffold |                                   |                              | 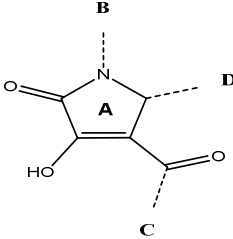  |                                                                                       |                                                                                       |
|----------|-----------------------------------|------------------------------|--------------------------------------------------------------------------------------|---------------------------------------------------------------------------------------|---------------------------------------------------------------------------------------|
| smx      | $K_D$ ( $\mu\text{M}$ , estimate) | $K_D$ ( $\mu\text{M}$ , NMR) | N1 (B)                                                                               | 4-keto (C)                                                                            | 5-aryl (D)                                                                            |
| GA245    | $2540 \pm 1214$                   |                              |    |    |    |
| GA270    | $2675 \pm 1621$                   |                              |    |    |    |
| GA257    | $2749 \pm 1535$                   |                              |    |    |    |
| GA236    | $3060 \pm 2222$                   |                              |  |  |  |
| GA233    | $3160 \pm 1317$                   |                              |  |  |  |

Supplementary Table 1: Substructures by potency

| Scaffold |                                   |                              | 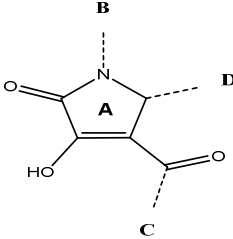  |                                                                                       |                                                                                       |
|----------|-----------------------------------|------------------------------|--------------------------------------------------------------------------------------|---------------------------------------------------------------------------------------|---------------------------------------------------------------------------------------|
| smx      | $K_D$ ( $\mu\text{M}$ , estimate) | $K_D$ ( $\mu\text{M}$ , NMR) | N1 (B)                                                                               | 4-keto (C)                                                                            | 5-aryl (D)                                                                            |
| GA247    | $3247 \pm 2066$                   |                              |    |    |    |
| VPL-2    | $3279 \pm 2052$                   |                              |    |    |    |
| GA215    | $3385 \pm 1232$                   |                              |    |    |    |
| GA248    | $3646 \pm 1077$                   |                              |  |  |  |
| GA276    | $3692 \pm 432$                    |                              |  |  |  |



Supplementary Table 1: Substructures by potency

| Scaffold    |                                   |                              | 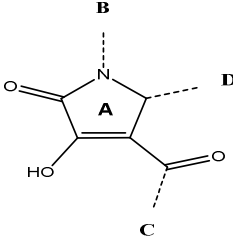  |                                                                                       |                                                                                       |
|-------------|-----------------------------------|------------------------------|--------------------------------------------------------------------------------------|---------------------------------------------------------------------------------------|---------------------------------------------------------------------------------------|
| smx         | $K_D$ ( $\mu\text{M}$ , estimate) | $K_D$ ( $\mu\text{M}$ , NMR) | N1 (B)                                                                               | 4-keto (C)                                                                            | 5-aryl (D)                                                                            |
| GA280       | $3962 \pm 2054$                   |                              |    |    |    |
| VPL-15      | $4044 \pm 1631$                   |                              |    |    |    |
| GA268=GA319 | $4094 \pm 1324$                   |                              |    |    |    |
| GA278       | $4192 \pm 1465$                   |                              |   |   |   |
| GA220       | $4501 \pm 1785$                   |                              |  |  |  |
| GA281       | $4580 \pm 1266$                   |                              |  |  |  |

Supplementary Table 1: Substructures by potency

| Scaffold |                                   |                              |                                                                                      | 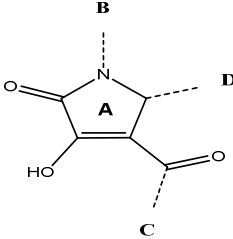   |                                                                                       |
|----------|-----------------------------------|------------------------------|--------------------------------------------------------------------------------------|---------------------------------------------------------------------------------------|---------------------------------------------------------------------------------------|
| smx      | $K_D$ ( $\mu\text{M}$ , estimate) | $K_D$ ( $\mu\text{M}$ , NMR) | N1 (B)                                                                               | 4-keto (C)                                                                            | 5-aryl (D)                                                                            |
| GA296    | 4595 $\pm$ 3288                   |                              |    |    |    |
| GA289    | 4851 $\pm$ 3780                   |                              |    |    |    |
| GA277    | 4860 $\pm$ 2405                   |                              |    |    |    |
| GA240    | 4930 $\pm$ 2335                   |                              |   |   |   |
| GA282    | 5034 $\pm$ 2330                   |                              |  |  |  |
| GA273    | 5264 $\pm$ 2274                   |                              |  |  |  |

Supplementary Table 1: Substructures by potency

| Scaffold |                                   |                              |                                                                                      | 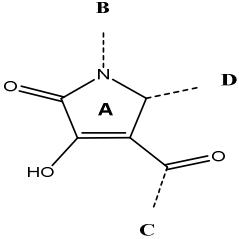   |                                                                                       |
|----------|-----------------------------------|------------------------------|--------------------------------------------------------------------------------------|---------------------------------------------------------------------------------------|---------------------------------------------------------------------------------------|
| smx      | $K_D$ ( $\mu\text{M}$ , estimate) | $K_D$ ( $\mu\text{M}$ , NMR) | N1 (B)                                                                               | 4-keto (C)                                                                            | 5-aryl (D)                                                                            |
| GA265    | $5267 \pm 3437$                   |                              |    |    |    |
| GA261    | $5282 \pm 2286$                   |                              |    |    |    |
| GA317    | $5414 \pm 2964$                   |                              |    |    |    |
| GA323    | $5477 \pm 4894$                   |                              |   |   |   |
| GA283    | $5623 \pm 5341$                   |                              |  |  |  |
| GA279    | $6340 \pm 4469$                   |                              |  |  |  |

**Supplementary Table 1: Substructures by potency**

| Scaffold |                                   |                              |                                                                                    | 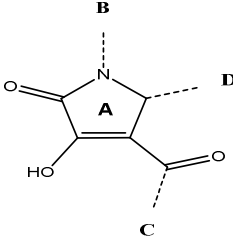 |                                                                                     |
|----------|-----------------------------------|------------------------------|------------------------------------------------------------------------------------|-------------------------------------------------------------------------------------|-------------------------------------------------------------------------------------|
| smx      | $K_D$ ( $\mu\text{M}$ , estimate) | $K_D$ ( $\mu\text{M}$ , NMR) | N1 (B)                                                                             | 4-keto (C)                                                                          | 5-aryl (D)                                                                          |
| GA305    | $8240 \pm 8960$                   |                              |  |  |  |
| VPL-62   | -                                 | ND                           |  |  |  |

Supplementary Table 2: Substructures by functional groups

| Scaffold |                                   |                              |                                                                                      | 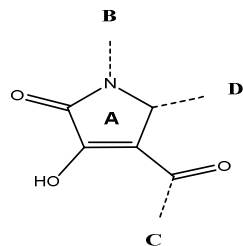   |                                                                                       |                  |
|----------|-----------------------------------|------------------------------|--------------------------------------------------------------------------------------|---------------------------------------------------------------------------------------|---------------------------------------------------------------------------------------|------------------|
| smx      | $K_D$ ( $\mu\text{M}$ , estimate) | $K_D$ ( $\mu\text{M}$ , NMR) | N1 (B)                                                                               | 4-keto (C)                                                                            | 5-aryl (D)                                                                            | scaffold changes |
| VPL-64   | $30 \pm 7$                        | $58.90 \pm 21.1$             |    |    |    |                  |
| VPL-61   | $36 \pm 10$                       | $38.7 \pm 16.0$              |    |    |    |                  |
| VPL-29   | $60 \pm 16$                       | $70.6 \pm 7.9$               |    |    |    |                  |
| VPL-4    | $655 \pm 183$                     |                              |   |   |   |                  |
| GA017-E  | $1211 \pm 1356$                   |                              |  |  |  |                  |
| VPL-31   | $384 \pm 76$                      |                              |  |  |  |                  |
| VPL-25   | $533 \pm 60$                      |                              |  |  |  |                  |

Supplementary Table 2: Substructures by functional groups

| Scaffold    |                                   |                              |                                                                                      | 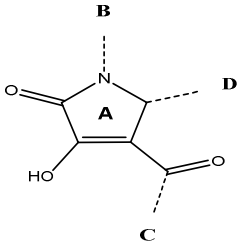   |                                                                                       |                  |
|-------------|-----------------------------------|------------------------------|--------------------------------------------------------------------------------------|---------------------------------------------------------------------------------------|---------------------------------------------------------------------------------------|------------------|
| smx         | $K_D$ ( $\mu\text{M}$ , estimate) | $K_D$ ( $\mu\text{M}$ , NMR) | N1 (B)                                                                               | 4-keto (C)                                                                            | 5-aryl (D)                                                                            | scaffold changes |
| GA270       | $2675 \pm 1621$                   |                              |    |    |    |                  |
| GA276       | $3692 \pm 432$                    |                              |    |    |    |                  |
| GA268=GA319 | $4094 \pm 1324$                   |                              |    |   |    |                  |
| VPL-53      | $418 \pm 70$                      |                              |  |  |  |                  |
| GA017-F2    | $2023 \pm 2434$                   |                              |  |  |  |                  |

Supplementary Table 2: Substructures by functional groups

| Scaffold |                                   |                              |                                                                                      | 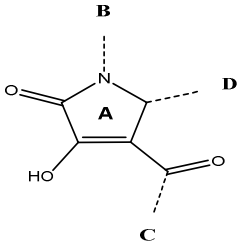   |                                                                                       |                  |
|----------|-----------------------------------|------------------------------|--------------------------------------------------------------------------------------|---------------------------------------------------------------------------------------|---------------------------------------------------------------------------------------|------------------|
| smx      | $K_D$ ( $\mu\text{M}$ , estimate) | $K_D$ ( $\mu\text{M}$ , NMR) | N1 (B)                                                                               | 4-keto (C)                                                                            | 5-aryl (D)                                                                            | scaffold changes |
| VPL-27   | $124 \pm 36$                      | $214.6 \pm 24.9$             |    |    |    |                  |
| VPL-57   | $52 \pm 10$                       | $73.0 \pm 31.0$              |    |    |    |                  |
| VPL-58   | $52 \pm 10$                       | $73.0 \pm 31.0$              |    |    |    |                  |
| VPL-52   | $80 \pm 3$                        | $60.9 \pm 3.0$               |  |  |  |                  |
| VPL-45   | $101 \pm 25$                      | $92.5 \pm 8.4$               |  |  |  |                  |
| VPL-46   | $63 \pm 18$                       | $70.6 \pm 7.9$               |  |  |  |                  |

Supplementary Table 2: Substructures by functional groups

| Scaffold |                                   |                              |                                                                                      | 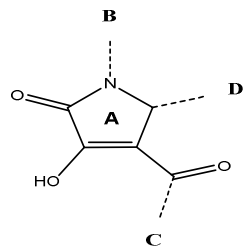   |                                                                                       |                  |
|----------|-----------------------------------|------------------------------|--------------------------------------------------------------------------------------|---------------------------------------------------------------------------------------|---------------------------------------------------------------------------------------|------------------|
| smx      | $K_D$ ( $\mu\text{M}$ , estimate) | $K_D$ ( $\mu\text{M}$ , NMR) | N1 (B)                                                                               | 4-keto (C)                                                                            | 5-aryl (D)                                                                            | scaffold changes |
| VPL-60   | $33 \pm 7$                        | $50.4 \pm 4.7$               |    |    |    |                  |
| VPL-59   | $47 \pm 38$                       | $55.7 \pm 4.9$               |    |    |    |                  |
| VPL-41   | $120 \pm 11$                      | $129.5 \pm 35.1$             |    |    |    |                  |
| VPL-38   | $149 \pm 45$                      | $98.0 \pm 36.0$              |    |    |    |                  |
| GA017-D  | $296 \pm 111$                     |                              |   |  |   |                  |
| GA239    | $323 \pm 109$                     |                              |  |  |  |                  |
| GA229    | $353 \pm 159$                     |                              |  |  |  |                  |



Supplementary Table 2: Substructures by functional groups

| Scaffold    |                                   |                              |                                                                                      | 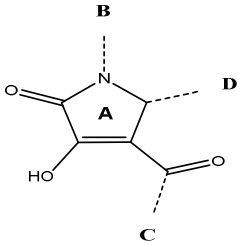   |                                                                                       |                  |
|-------------|-----------------------------------|------------------------------|--------------------------------------------------------------------------------------|---------------------------------------------------------------------------------------|---------------------------------------------------------------------------------------|------------------|
| smx         | $K_D$ ( $\mu\text{M}$ , estimate) | $K_D$ ( $\mu\text{M}$ , NMR) | N1 (B)                                                                               | 4-keto (C)                                                                            | 5-aryl (D)                                                                            | scaffold changes |
| VPL-56      | $1232 \pm 115$                    |                              |    |    |    |                  |
| GA241       | $609 \pm 101$                     |                              |    |    |    |                  |
| GA255       | $1210 \pm 278$                    |                              |    |    |    |                  |
| GA214       | $2348 \pm 1423$                   |                              |   |   |   |                  |
| GA244=GA302 | $1309 \pm 406$                    |                              |  |  |  |                  |
| GA219       | $1618 \pm 1034$                   |                              |  |  |  |                  |

Supplementary Table 2: Substructures by functional groups

| Scaffold |                                   |                              |                                                                                      | 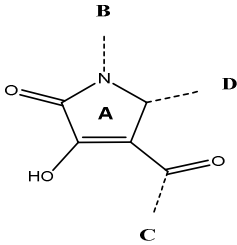   |                                                                                       |                  |
|----------|-----------------------------------|------------------------------|--------------------------------------------------------------------------------------|---------------------------------------------------------------------------------------|---------------------------------------------------------------------------------------|------------------|
| smx      | $K_D$ ( $\mu\text{M}$ , estimate) | $K_D$ ( $\mu\text{M}$ , NMR) | N1 (B)                                                                               | 4-keto (C)                                                                            | 5-aryl (D)                                                                            | scaffold changes |
| GA216    | $1890 \pm 1834$                   |                              |    |    |    |                  |
| GA247    | $3247 \pm 2066$                   |                              |    |    |    |                  |
| VPL-63   | $453 \pm 252$                     | $518.1 \pm 310.2$            |   |   |   |                  |
| VPL-49   | $79 \pm 17$                       | $79.2 \pm 8.5$               |  |  |  |                  |
| GA272    | $128 \pm 34$                      | 111.90                       |  |  |  |                  |
| VPL-55   | $152 \pm 40$                      | $111.9 \pm 30.7$             |  |  |  |                  |

Supplementary Table 2: Substructures by functional groups

| Scaffold    |                                   |                              |                                                                                      | 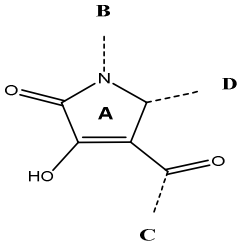   |                                                                                       |                  |
|-------------|-----------------------------------|------------------------------|--------------------------------------------------------------------------------------|---------------------------------------------------------------------------------------|---------------------------------------------------------------------------------------|------------------|
| smx         | $K_D$ ( $\mu\text{M}$ , estimate) | $K_D$ ( $\mu\text{M}$ , NMR) | N1 (B)                                                                               | 4-keto (C)                                                                            | 5-aryl (D)                                                                            | scaffold changes |
| GA307       | $179 \pm 72$                      |                              |    |    |    |                  |
| GA250=GA306 | $565 \pm 237$                     |                              |    |    |    |                  |
| GA226       | $851 \pm 150$                     |                              |    |    |    |                  |
| VPL-8       | $357 \pm 68$                      |                              |   |   |   |                  |
| GA234       | $385 \pm 145$                     |                              |  |  |  |                  |
| GA308       | $936 \pm 30$                      |                              |  |  |  |                  |

Supplementary Table 2: Substructures by functional groups

| Scaffold |                                   |                              |                                                                                      | 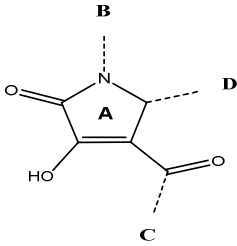   |                                                                                       |                  |
|----------|-----------------------------------|------------------------------|--------------------------------------------------------------------------------------|---------------------------------------------------------------------------------------|---------------------------------------------------------------------------------------|------------------|
| smx      | $K_D$ ( $\mu\text{M}$ , estimate) | $K_D$ ( $\mu\text{M}$ , NMR) | N1 (B)                                                                               | 4-keto (C)                                                                            | 5-aryl (D)                                                                            | scaffold changes |
| GA215    | $3385 \pm 1232$                   |                              |    |    |    |                  |
| GA240    | $4930 \pm 2335$                   |                              |    |    |    |                  |
| GA221    | $1137 \pm 268$                    |                              |    |    |    |                  |
| GA282    | $5034 \pm 2330$                   |                              |   |   |   |                  |
| GA265    | $5267 \pm 3437$                   |                              |  |  |  |                  |
| GA261    | $5282 \pm 2286$                   |                              |  |  |  |                  |

Supplementary Table 2: Substructures by functional groups

| Scaffold    |                                   |                              |                                                                                      | 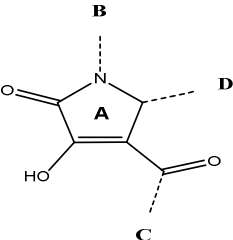   |                                                                                       |                  |
|-------------|-----------------------------------|------------------------------|--------------------------------------------------------------------------------------|---------------------------------------------------------------------------------------|---------------------------------------------------------------------------------------|------------------|
| smx         | $K_D$ ( $\mu\text{M}$ , estimate) | $K_D$ ( $\mu\text{M}$ , NMR) | N1 (B)                                                                               | 4-keto (C)                                                                            | 5-aryl (D)                                                                            | scaffold changes |
| GA317       | $5414 \pm 2964$                   |                              |    |    |    |                  |
| GA023       | $1215 \pm 459$                    |                              |    |    |    |                  |
| GA227       | $1423 \pm 268$                    |                              |    |    |    |                  |
| GA243=GA301 | $386 \pm 83$                      |                              |   |   |   |                  |
| GA249       | $517 \pm 127$                     |                              |  |  |  |                  |
| GA224       | $837 \pm 521$                     |                              |  |  |  |                  |

Supplementary Table 2: Substructures by functional groups

| Scaffold |                                   |                              |        |            |            |                  |
|----------|-----------------------------------|------------------------------|--------|------------|------------|------------------|
| smx      | $K_D$ ( $\mu\text{M}$ , estimate) | $K_D$ ( $\mu\text{M}$ , NMR) | N1 (B) | 4-keto (C) | 5-aryl (D) | scaffold changes |
| GA242    | $983 \pm 167$                     |                              |        |            |            |                  |
| GA218    | $453 \pm 91$                      |                              |        |            |            |                  |
| GA324    | $585 \pm 34$                      |                              |        |            |            |                  |
| VPL-17   | $1385 \pm 983$                    |                              |        |            |            |                  |
|          |                                   |                              |        |            |            |                  |
|          |                                   |                              |        |            |            |                  |
|          |                                   |                              |        |            |            |                  |
| VPL-42   | $46 \pm 19$                       | $36.8 \pm 8.1$               |        |            |            |                  |
| VPL-40   | $126 \pm 32$                      | $369.8 \pm 173.3$            |        |            |            |                  |

Supplementary Table 2: Substructures by functional groups

| Scaffold    |                                   |                              |                                                                                      | 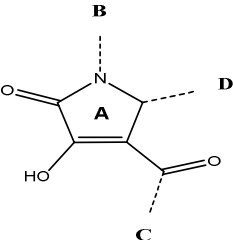   |                                                                                       |                  |
|-------------|-----------------------------------|------------------------------|--------------------------------------------------------------------------------------|---------------------------------------------------------------------------------------|---------------------------------------------------------------------------------------|------------------|
| smx         | $K_D$ ( $\mu\text{M}$ , estimate) | $K_D$ ( $\mu\text{M}$ , NMR) | N1 (B)                                                                               | 4-keto (C)                                                                            | 5-aryl (D)                                                                            | scaffold changes |
| VPL-24      | $161 \pm 82$                      |                              |    |    |    |                  |
| VPL-36      | $36 \pm 13$                       | $49.9 \pm 9.8$               |    |    |    |                  |
| VPL-34      | $39 \pm 16$                       | $63.9 \pm 17.7$              |    |    |    |                  |
| VPL-39      | $70 \pm 14$                       | $65.8 \pm 10.2$              |    |    |    |                  |
| VPL-23      | $161 \pm 86$                      |                              |  |  |  |                  |
| VPL-22      | $478 \pm 187$                     |                              |  |  |  |                  |
| GA274=GA322 | $264 \pm 63$                      |                              |  |  |  |                  |

Supplementary Table 2: Substructures by functional groups

| Scaffold    |                                   |                              |                                                                                      | 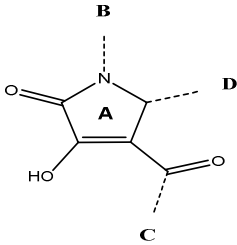   |                                                                                       |                  |
|-------------|-----------------------------------|------------------------------|--------------------------------------------------------------------------------------|---------------------------------------------------------------------------------------|---------------------------------------------------------------------------------------|------------------|
| smx         | $K_D$ ( $\mu\text{M}$ , estimate) | $K_D$ ( $\mu\text{M}$ , NMR) | N1 (B)                                                                               | 4-keto (C)                                                                            | 5-aryl (D)                                                                            | scaffold changes |
| GA222       | $346 \pm 136$                     |                              |    |    |    |                  |
| GA217=GA288 | $420 \pm 70$                      |                              |    |    |    |                  |
| VPL-35      | $483 \pm 134$                     |                              |    |    |    |                  |
| VPL-14      | $512 \pm 94$                      |                              |   |   |    |                  |
| GA291       | $2508 \pm 2240$                   |                              |  |  |  |                  |
| GA235=GA297 | $537 \pm 62$                      |                              |  |  |  |                  |



Supplementary Table 2: Substructures by functional groups

| Scaffold    |                                   |                              |                                                                                      | 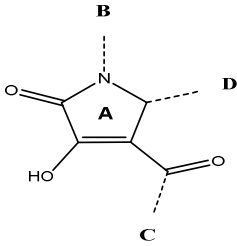   |                                                                                       |                  |
|-------------|-----------------------------------|------------------------------|--------------------------------------------------------------------------------------|---------------------------------------------------------------------------------------|---------------------------------------------------------------------------------------|------------------|
| smx         | $K_D$ ( $\mu\text{M}$ , estimate) | $K_D$ ( $\mu\text{M}$ , NMR) | N1 (B)                                                                               | 4-keto (C)                                                                            | 5-aryl (D)                                                                            | scaffold changes |
| GA017       | $555 \pm 112$                     | $270.7 \pm 80.0$             |    |    |    |                  |
| GA266       | $2474 \pm 1011$                   |                              |    |    |    |                  |
| GA223=GA290 | $927 \pm 112$                     |                              |    |    |    |                  |
| GA225       | $1860 \pm 876$                    |                              |  |  |  |                  |
| GA280       | $3962 \pm 2054$                   |                              |  |  |  |                  |

Supplementary Table 2: Substructures by functional groups

| Scaffold |                                   |                              |                                                                                      | 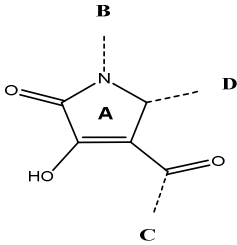   |                                                                                       |                  |
|----------|-----------------------------------|------------------------------|--------------------------------------------------------------------------------------|---------------------------------------------------------------------------------------|---------------------------------------------------------------------------------------|------------------|
| smx      | $K_D$ ( $\mu\text{M}$ , estimate) | $K_D$ ( $\mu\text{M}$ , NMR) | N1 (B)                                                                               | 4-keto (C)                                                                            | 5-aryl (D)                                                                            | scaffold changes |
| VPL-7    | $378 \pm 72$                      |                              |    |    |    |                  |
| VPL-51   | $49 \pm 35$                       | $44.8 \pm 3.2$               |    |    |    |                  |
| VPL-50   | $80 \pm 26$                       | $63.9 \pm 7.4$               |    |    |    |                  |
| VPL-11   | $134 \pm 11$                      | $124.3 \pm 16.2$             |   |   |   |                  |
| VPL-48   | $79 \pm 3$                        | $108.0 \pm 7.0$              |  |  |  |                  |
| VPL-47   | $138 \pm 40$                      |                              |  |  |  |                  |
| VPL-43   | $77 \pm 15$                       | $81.7 \pm 6.1$               |  |  |  |                  |

Supplementary Table 2: Substructures by functional groups

| Scaffold    |                                   |                              |                                                                                      | 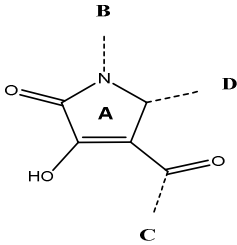   |                                                                                       |                  |
|-------------|-----------------------------------|------------------------------|--------------------------------------------------------------------------------------|---------------------------------------------------------------------------------------|---------------------------------------------------------------------------------------|------------------|
| smx         | $K_D$ ( $\mu\text{M}$ , estimate) | $K_D$ ( $\mu\text{M}$ , NMR) | N1 (B)                                                                               | 4-keto (C)                                                                            | 5-aryl (D)                                                                            | scaffold changes |
| VPL-44      | $89 \pm 14$                       | $99.9 \pm 25.9$              |    |    |    |                  |
| GA239       | $323 \pm 109$                     |                              |    |    |    |                  |
| VPL-19      | $346 \pm 168$                     |                              |    |    |    |                  |
| VPL-13      | $372 \pm 87$                      |                              |    |    |    |                  |
| GA312=GA259 | $101 \pm 40$                      | $103.8 \pm 41.7$             |  |  |  |                  |
| VPL-33      | $109 \pm 2$                       | $110.9 \pm 41.2$             |  |  |  |                  |
| VPL-37      | $117 \pm 12$                      | $74.6 \pm 14.5$              |  |  |  |                  |

Supplementary Table 2: Substructures by functional groups

| Scaffold    |                                   |                              |                                                                                      | 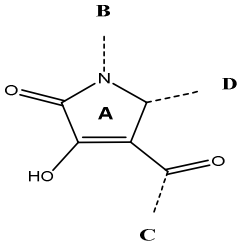   |                                                                                       |                  |
|-------------|-----------------------------------|------------------------------|--------------------------------------------------------------------------------------|---------------------------------------------------------------------------------------|---------------------------------------------------------------------------------------|------------------|
| smx         | $K_D$ ( $\mu\text{M}$ , estimate) | $K_D$ ( $\mu\text{M}$ , NMR) | N1 (B)                                                                               | 4-keto (C)                                                                            | 5-aryl (D)                                                                            | scaffold changes |
| GA228=GA292 | $127 \pm 5$                       | $291.9 \pm 17.5$             |    |    |    |                  |
| VPL-32      | $135 \pm 44$                      | $280.2 \pm 51.2$             |    |    |    |                  |
| GA307       | $179 \pm 72$                      |                              |    |    |    |                  |
| GA272-B     | $204 \pm 28$                      | $114.1 \pm 20.6$             |    |    |    |                  |
| GA294       | 275                               |                              |  |  |  |                  |
| GA294       | $275 \pm 39$                      |                              |  |  |  |                  |
| VPL-5       | $335 \pm 38$                      |                              |  |  |  |                  |

Supplementary Table 2: Substructures by functional groups

| Scaffold |                                   |                              |                                                                                      | 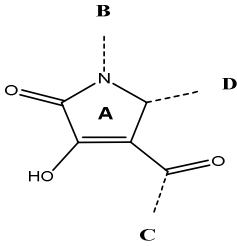   |                                                                                       |                  |
|----------|-----------------------------------|------------------------------|--------------------------------------------------------------------------------------|---------------------------------------------------------------------------------------|---------------------------------------------------------------------------------------|------------------|
| smx      | $K_D$ ( $\mu\text{M}$ , estimate) | $K_D$ ( $\mu\text{M}$ , NMR) | N1 (B)                                                                               | 4-keto (C)                                                                            | 5-aryl (D)                                                                            | scaffold changes |
| GA251    | $369 \pm 134$                     |                              |    |    |    |                  |
| GA231    | $447 \pm 100$                     |                              |    |    |    |                  |
| VPL-20   | $485 \pm 172$                     |                              |    |    |    |                  |
| GA293    | $502 \pm 52$                      |                              |   |    |   |                  |
| GA287    | $547 \pm 48$                      |                              |  |  |  |                  |
| GA299    | $552 \pm 149$                     |                              |  |  |  |                  |
| GA230    | $659 \pm 231$                     |                              |  |  |  |                  |

Supplementary Table 2: Substructures by functional groups

| Scaffold |                                   |                              |                                                                                      | 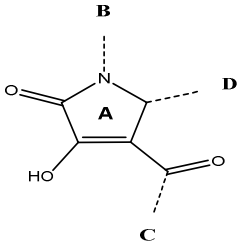   |                                                                                       |                  |
|----------|-----------------------------------|------------------------------|--------------------------------------------------------------------------------------|---------------------------------------------------------------------------------------|---------------------------------------------------------------------------------------|------------------|
| smx      | $K_D$ ( $\mu\text{M}$ , estimate) | $K_D$ ( $\mu\text{M}$ , NMR) | N1 (B)                                                                               | 4-keto (C)                                                                            | 5-aryl (D)                                                                            | scaffold changes |
| GA320    | $726 \pm 151$                     |                              |    |    |    |                  |
| VPL-30   | $764 \pm 383$                     |                              |    |    |    |                  |
| VPL-9    | $2005 \pm 671$                    |                              |    |    |    | no carbonyl      |
| VPL-1    | $2354 \pm 2418$                   |                              |   |   |   |                  |
| GA213    | $773 \pm 142$                     |                              |  |  |  |                  |
| GA300    | $840 \pm 155$                     |                              |  |  |  |                  |

Supplementary Table 2: Substructures by functional groups

| Scaffold |                                   |                              |                                                                                      | 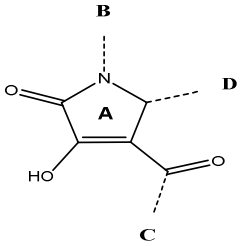   |                                                                                       |                  |
|----------|-----------------------------------|------------------------------|--------------------------------------------------------------------------------------|---------------------------------------------------------------------------------------|---------------------------------------------------------------------------------------|------------------|
| smx      | $K_D$ ( $\mu\text{M}$ , estimate) | $K_D$ ( $\mu\text{M}$ , NMR) | N1 (B)                                                                               | 4-keto (C)                                                                            | 5-aryl (D)                                                                            | scaffold changes |
| GA271    | $836 \pm 279$                     |                              |    |    |    |                  |
| GA269    | $876 \pm 266$                     |                              |    |    |    |                  |
| GA237    | $889 \pm 218$                     |                              |    |    |    |                  |
| GA321    | $924 \pm 233$                     |                              |  |  |  |                  |
| GA232    | $1069 \pm 193$                    |                              |  |  |  |                  |
| GA238    | $1120 \pm 374$                    |                              |  |  |  |                  |

Supplementary Table 2: Substructures by functional groups

| Scaffold |                                   |                              |                                                                                      | 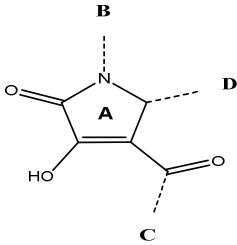   |                                                                                       |                  |
|----------|-----------------------------------|------------------------------|--------------------------------------------------------------------------------------|---------------------------------------------------------------------------------------|---------------------------------------------------------------------------------------|------------------|
| smx      | $K_D$ ( $\mu\text{M}$ , estimate) | $K_D$ ( $\mu\text{M}$ , NMR) | N1 (B)                                                                               | 4-keto (C)                                                                            | 5-aryl (D)                                                                            | scaffold changes |
| GA295    | $1222 \pm 144$                    |                              |    |    |    |                  |
| GA233    | $3160 \pm 1317$                   |                              |    |    |    |                  |
| GA248    | $3646 \pm 1077$                   |                              |    |    |    |                  |
| GA296    | $4595 \pm 3288$                   |                              |  |  |  |                  |
| GA305    | $8240 \pm 8960$                   |                              |  |  |  |                  |



Supplementary Table 2: Substructures by functional groups

| Scaffold |                                   |                              |                                                                                      | 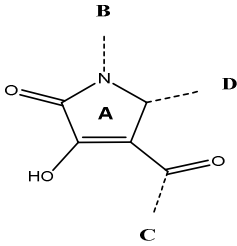   |                                                                                       |                  |
|----------|-----------------------------------|------------------------------|--------------------------------------------------------------------------------------|---------------------------------------------------------------------------------------|---------------------------------------------------------------------------------------|------------------|
| smx      | $K_D$ ( $\mu\text{M}$ , estimate) | $K_D$ ( $\mu\text{M}$ , NMR) | N1 (B)                                                                               | 4-keto (C)                                                                            | 5-aryl (D)                                                                            | scaffold changes |
| GA286    | $238 \pm 48$                      |                              |    |    |    |                  |
| GA314    | $313 \pm 88$                      |                              |    |    |    |                  |
| GA256    | $330 \pm 158$                     |                              |    |    |    |                  |
| GA212    | $331 \pm 62$                      |                              |    |    |    |                  |
| GA262    | $504 \pm 204$                     |                              |   |   |   |                  |
| GA285    | $626 \pm 109$                     |                              |  |  |  |                  |

Supplementary Table 2: Substructures by functional groups

| Scaffold |                                   |                              |                                                                                      | 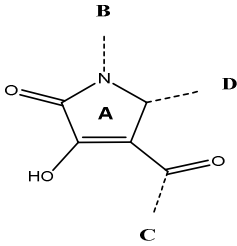   |                                                                                       |                  |
|----------|-----------------------------------|------------------------------|--------------------------------------------------------------------------------------|---------------------------------------------------------------------------------------|---------------------------------------------------------------------------------------|------------------|
| smx      | $K_D$ ( $\mu\text{M}$ , estimate) | $K_D$ ( $\mu\text{M}$ , NMR) | N1 (B)                                                                               | 4-keto (C)                                                                            | 5-aryl (D)                                                                            | scaffold changes |
| GA311    | $690 \pm 104$                     |                              |    |    |    |                  |
| GA210    | $752 \pm 175$                     |                              |    |    |    |                  |
| GA258    | $760 \pm 166$                     |                              |    |    |    |                  |
| GA315    | $260 \pm 49$                      |                              |  |  |  |                  |
| GA263    | $417 \pm 107$                     |                              |  |  |  |                  |
| VPL-26   | $834 \pm 324$                     |                              |  |  |  |                  |

Supplementary Table 2: Substructures by functional groups

| Scaffold |                                   |                              |                                                                                      | 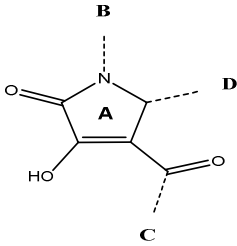   |                                                                                       |                  |
|----------|-----------------------------------|------------------------------|--------------------------------------------------------------------------------------|---------------------------------------------------------------------------------------|---------------------------------------------------------------------------------------|------------------|
| smx      | $K_D$ ( $\mu\text{M}$ , estimate) | $K_D$ ( $\mu\text{M}$ , NMR) | N1 (B)                                                                               | 4-keto (C)                                                                            | 5-aryl (D)                                                                            | scaffold changes |
| GA260    | $988 \pm 260$                     |                              |    |    |    |                  |
| VPL-21   | $266 \pm 47$                      |                              |    |    |    |                  |
| VPL-12   | $1588 \pm 620$                    |                              |    |    |    |                  |
| VPL-6    | $307 \pm 51$                      |                              |    |    |    |                  |
| GA315    | $260 \pm 49$                      |                              |  |  |  |                  |
| GA304    | $629 \pm 98$                      |                              |  |  |  |                  |
| GA246    | $1049 \pm 328$                    |                              |  |  |  |                  |

Supplementary Table 2: Substructures by functional groups

| Scaffold    |                                   |                              |                                                                                      | 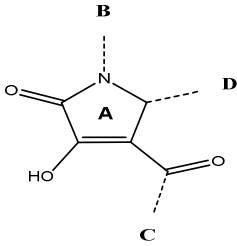   |                                                                                       |                  |
|-------------|-----------------------------------|------------------------------|--------------------------------------------------------------------------------------|---------------------------------------------------------------------------------------|---------------------------------------------------------------------------------------|------------------|
| smx         | $K_D$ ( $\mu\text{M}$ , estimate) | $K_D$ ( $\mu\text{M}$ , NMR) | N1 (B)                                                                               | 4-keto (C)                                                                            | 5-aryl (D)                                                                            | scaffold changes |
| GA298       | $1324 \pm 402$                    |                              |    |    |    |                  |
| GA254=GA310 | $475 \pm 60$                      |                              |    |    |    |                  |
| GA267       | $888 \pm 122$                     |                              |    |    |    |                  |
| GA252       | $1472 \pm 332$                    |                              |   |   |   |                  |
| GA318       | $1062 \pm 49$                     |                              |  |  |  |                  |
| GA022       | $753 \pm 74$                      |                              |  |  |  |                  |
| GA303       | $2152 \pm 201$                    |                              |  |  |  |                  |

Supplementary Table 2: Substructures by functional groups

| Scaffold |                                   |                              |                                                                                      | 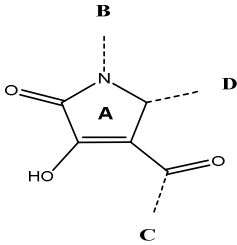   |                                                                                       |                  |
|----------|-----------------------------------|------------------------------|--------------------------------------------------------------------------------------|---------------------------------------------------------------------------------------|---------------------------------------------------------------------------------------|------------------|
| smx      | $K_D$ ( $\mu\text{M}$ , estimate) | $K_D$ ( $\mu\text{M}$ , NMR) | N1 (B)                                                                               | 4-keto (C)                                                                            | 5-aryl (D)                                                                            | scaffold changes |
| GA245    | 2540                              |                              |    |    |    |                  |
| GA236    | $3060 \pm 2222$                   |                              |    |    |    |                  |
| GA257    | $2749 \pm 1535$                   |                              |    |   |   |                  |
| GA278    | $4192 \pm 1465$                   |                              |  |  |  |                  |
| GA220    | $4501 \pm 1785$                   |                              |  |  |  |                  |

Supplementary Table 2: Substructures by functional groups

| Scaffold |                                   |                              |                                                                                      | 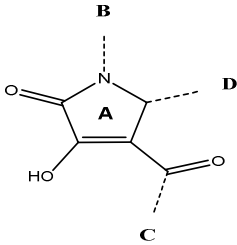   |                                                                                       |                  |
|----------|-----------------------------------|------------------------------|--------------------------------------------------------------------------------------|---------------------------------------------------------------------------------------|---------------------------------------------------------------------------------------|------------------|
| smx      | $K_D$ ( $\mu\text{M}$ , estimate) | $K_D$ ( $\mu\text{M}$ , NMR) | N1 (B)                                                                               | 4-keto (C)                                                                            | 5-aryl (D)                                                                            | scaffold changes |
| GA289    | $4851 \pm 3780$                   |                              |    |    |    |                  |
| GA277    | $4860 \pm 2405$                   |                              |    |    |    |                  |
| VPL-3    | $361 \pm 24$                      |                              |    |    |    |                  |
| GA281    | $4580 \pm 1266$                   |                              |   |   |   |                  |
| GA323    | $5477 \pm 4894$                   |                              |  |  |  |                  |
| VPL-10   | $1631 \pm 1125$                   |                              |  |  |  | cf vpl 3         |

Supplementary Table 2: Substructures by functional groups

| Scaffold |                                   |                              |                                                                                      | 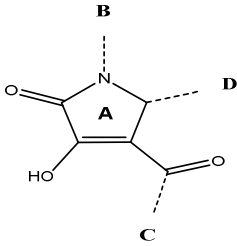   |                                                                                       |                  |
|----------|-----------------------------------|------------------------------|--------------------------------------------------------------------------------------|---------------------------------------------------------------------------------------|---------------------------------------------------------------------------------------|------------------|
| smx      | $K_D$ ( $\mu\text{M}$ , estimate) | $K_D$ ( $\mu\text{M}$ , NMR) | N1 (B)                                                                               | 4-keto (C)                                                                            | 5-aryl (D)                                                                            | scaffold changes |
| VPL-15   | 4044 $\pm$ 1631                   |                              |    |    |    |                  |
| GA021    | 1283 $\pm$ 138                    |                              |    |    |    |                  |
| VPL-2    | 3279 $\pm$ 2052                   |                              |    |    |    |                  |
| VPL-18   | 1537 $\pm$ 514                    |                              |  |  |  |                  |
| GA273    | 5264 $\pm$ 2274                   |                              |  |  |  |                  |

Supplementary Table 2: Substructures by functional groups

| Scaffold    |                                   |                              |                                                                                      | 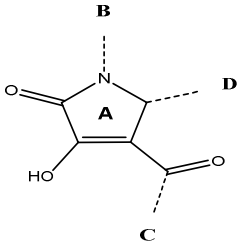   |                                                                                       |                  |
|-------------|-----------------------------------|------------------------------|--------------------------------------------------------------------------------------|---------------------------------------------------------------------------------------|---------------------------------------------------------------------------------------|------------------|
| smx         | $K_D$ ( $\mu\text{M}$ , estimate) | $K_D$ ( $\mu\text{M}$ , NMR) | N1 (B)                                                                               | 4-keto (C)                                                                            | 5-aryl (D)                                                                            | scaffold changes |
| GA279       | $6340 \pm 4469$                   |                              |    |    |    |                  |
| GA264=GA316 | $1256 \pm 335$                    |                              |    |    |    |                  |
| GA283       | $5623 \pm 5341$                   |                              |    |    |    |                  |
| GA313       | $516 \pm 92$                      |                              |   |   |   |                  |
| GA019       | $1177 \pm 54$                     |                              |  |  |  |                  |
| VPL-16      | $1436 \pm 717$                    |                              |  |  |  |                  |



Supplementary Table 2: Substructures by functional groups

| Scaffold |                                   |                              |                                                                                    | 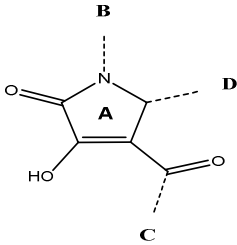 |                                                                                     |                  |
|----------|-----------------------------------|------------------------------|------------------------------------------------------------------------------------|-------------------------------------------------------------------------------------|-------------------------------------------------------------------------------------|------------------|
| smx      | $K_D$ ( $\mu\text{M}$ , estimate) | $K_D$ ( $\mu\text{M}$ , NMR) | N1 (B)                                                                             | 4-keto (C)                                                                          | 5-aryl (D)                                                                          | scaffold changes |
| VPL-28   | $458 \pm 108$                     |                              |  |  |  | **no carbonyl    |
| VPL-62   | -                                 | ND                           |  |  |  | cf vpl-56        |
